# Supplementary material for: An array CGH based genomic instability index (G2I) is predictive of clinical outcome in breast cancer and reveals a subset of tumors without lymph node involvement but with poor prognosis
Source: PubMed Central journal article supplement (PMC3558323; doi:10.1186/1755-8794-5-54), 2012-11-27
Supplement: 1755-8794-5-54-S1.pdf [file 1755-8794-5-54-S1.pdf]

Supplementary table 1: samples annotations

| ID (b)   | age (years) | SBR Scarff, Bloom and Richardson grade | tumor size (mm) | relapse 0 = no 1 = yes | delay (months) | pH histo Lymph node invasion 0 = negative 1 = positive | ER status (IHC <sup>a</sup> ) ER: estrogen receptor 0: <10% cells 1: >=10% cells | PR status (IHC) PR: progesterone receptor 0: <10% cells 1: >=10% cells | NPI (group) 1=excellent 2=good 3=moderate 4 = poor | Her2 status (IHC) 0: absence of signal 1-2-3: expression in at least 10% of cells with signal intensity of 1, 2 or 3 | mib-1 status (IHC) % of tumor cells expressing mib-1 | IHC phenotype Luminal A: HR =1, Her2 <3 and mib1 <20 Luminal B: HR=1, Her2<3 and mib1 >=20 HR2-enriched: Her2 =3 basal:ER and PR <10% , Her2 <3, pos or neg or oSIS or vimentin: pos nd:unclassified | array-CGH cluster | number of Amplicons | Number of altered regions N | Overall level of genomic alterations A | G21 G21-1=A<0.4876 and N=42.3638 | p53 status (IHC) 0: absence of signal 1: signal in at least 10% of tumor cells | TP53 mutation 0 : absence of mutation, 1: frameshift or nonsense mut. 2: missense mut. nd:unclassified | description of TP53 mutation |
|----------|-------------|----------------------------------------|-----------------|------------------------|----------------|--------------------------------------------------------|----------------------------------------------------------------------------------|------------------------------------------------------------------------|----------------------------------------------------|----------------------------------------------------------------------------------------------------------------------|------------------------------------------------------|------------------------------------------------------------------------------------------------------------------------------------------------------------------------------------------------------|-------------------|---------------------|-----------------------------|----------------------------------------|----------------------------------|--------------------------------------------------------------------------------|--------------------------------------------------------------------------------------------------------|------------------------------|
|          |             |                                        |                 |                        |                |                                                        |                                                                                  |                                                                        |                                                    |                                                                                                                      |                                                      |                                                                                                                                                                                                      |                   |                     |                             |                                        |                                  |                                                                                |                                                                                                        |                              |
| RELB_091 | 63          | 2                                      | 14              | 0                      | 132            | 0                                                      | 1                                                                                | 1                                                                      | 3                                                  | 0                                                                                                                    | 6                                                    | luminal A                                                                                                                                                                                            | c                 | 1                   | 35                          | 0.27                                   | 1                                | 0                                                                              | 0                                                                                                      |                              |
| RELB_092 | 62          | 2                                      | 12              | 0                      | 132            | 0                                                      | 1                                                                                | 1                                                                      | 3                                                  | 0                                                                                                                    | 15                                                   | luminal A                                                                                                                                                                                            | d                 | 0                   | 56                          | 0.38                                   | 2                                | 1                                                                              | 2                                                                                                      | Ex8 c.844 C>T R282W          |
| RELB_093 | 47          | 2                                      | 12              | 0                      | 132            | 1                                                      | 1                                                                                | 1                                                                      | 3                                                  | 0                                                                                                                    | 20                                                   | luminal A                                                                                                                                                                                            | a                 | 0                   | 47                          | 0.35                                   | 2                                | 0                                                                              | 1                                                                                                      | Ex4 c.106_124del19 P36X1     |
| RELB_094 | 46          | 2                                      | 25              | 0                      | 132            | 1                                                      | 1                                                                                | 1                                                                      | 3                                                  | 0                                                                                                                    | 16                                                   | luminal A                                                                                                                                                                                            | e                 | 0                   | 63                          | 0.51                                   | 2                                | 0                                                                              | 0                                                                                                      |                              |
| RELB_095 | 47          | 1                                      | 20              | 0                      | 132            | 0                                                      | 1                                                                                | 1                                                                      | 2                                                  | 0                                                                                                                    | 8                                                    | luminal A                                                                                                                                                                                            | e                 | 0                   | 41                          | 0.21                                   | 1                                | 0                                                                              | 0                                                                                                      |                              |
| RELB_096 | 45          | 2                                      | 20              | 1                      | 89             | 0                                                      | 1                                                                                | 1                                                                      | 3                                                  | 0                                                                                                                    | 8                                                    | luminal A                                                                                                                                                                                            | b                 | 0                   | 52                          | 0.31                                   | 2                                | 0                                                                              | 1                                                                                                      | Ex4 c.227_279del53 A76fsX54  |
| RELB_097 | 44          | 3                                      | 18              | 0                      | 132            | 1                                                      | 1                                                                                | 1                                                                      | 3                                                  | 0                                                                                                                    | 8                                                    | luminal A                                                                                                                                                                                            | c                 | 0                   | 29                          | 0.25                                   | 1                                | 0                                                                              | 0                                                                                                      |                              |
| RELB_098 | 51          | 3                                      | 20              | 0                      | 132            | 0                                                      | 0                                                                                | 0                                                                      | 3                                                  | 3                                                                                                                    | 15                                                   | Her2-enriched                                                                                                                                                                                        | a                 | 4                   | 69                          | 0.31                                   | 2                                | 0                                                                              | 1                                                                                                      | Ex5 c.546 C>A C182X          |
| RELB_099 | 42          | 3                                      | 20              | 1                      | 15             | 0                                                      | 1                                                                                | 1                                                                      | 3                                                  | 0                                                                                                                    | 13                                                   | luminal A                                                                                                                                                                                            | e                 | 0                   | 82                          | 0.47                                   | 3                                | 1                                                                              | 2                                                                                                      | Ex7 c.747 G>C R249S          |
| RELB_100 | 70          | 3                                      | 23              | 1                      | 8              | 0                                                      | 0                                                                                | 0                                                                      | 3                                                  | 0                                                                                                                    | 60                                                   | Basal                                                                                                                                                                                                | f                 | 9                   | 106                         | 0.71                                   | 3                                | 0                                                                              | 1                                                                                                      | Ex6 c.615 T>C Y205X          |
| RELB_101 | 68          | 2                                      | 22              | 1                      | 110            | 1                                                      | 1                                                                                | 1                                                                      | 3                                                  | 0                                                                                                                    | 5                                                    | luminal A                                                                                                                                                                                            | c                 | 0                   | 64                          | 0.29                                   | 2                                | 0                                                                              | 0                                                                                                      |                              |
| RELB_102 | 56          | 2                                      | 16              | 1                      | 63             | 0                                                      | 1                                                                                | 1                                                                      | 2                                                  | 0                                                                                                                    | 11                                                   | luminal A                                                                                                                                                                                            | b                 | 0                   | 90                          | 0.19                                   | 2                                | 0                                                                              | 0                                                                                                      |                              |
| RELB_103 | 44          | 2                                      | 30              | 1                      | 21             | 1                                                      | 1                                                                                | 1                                                                      | 4                                                  | 0                                                                                                                    | 9                                                    | luminal A                                                                                                                                                                                            | e                 | 1                   | 88                          | 0.33                                   | 2                                | 0                                                                              | 0                                                                                                      |                              |
| RELB_104 | 54          | 1                                      | 38              | 0                      | 132            | 0                                                      | 1                                                                                | 1                                                                      | 3                                                  | 0                                                                                                                    | 5                                                    | luminal A                                                                                                                                                                                            | b                 | 0                   | 46                          | 0.28                                   | 2                                | 1                                                                              | 2                                                                                                      | Ex4 c.370 T>C C124R          |
| RELB_105 | 73          | 3                                      | 25              | 0                      | 132            | 0                                                      | 1                                                                                | 1                                                                      | 3                                                  | 2                                                                                                                    | 28                                                   | Luminal B                                                                                                                                                                                            | a                 | 2                   | 56                          | 0.36                                   | 2                                | 0                                                                              | 0                                                                                                      |                              |
| RELB_106 | 33          | 3                                      | 20              | 1                      | 24             | 0                                                      | 1                                                                                | 1                                                                      | 3                                                  | 0                                                                                                                    | 22                                                   | Luminal B                                                                                                                                                                                            | f                 | 2                   | 123                         | 0.52                                   | 3                                | 1                                                                              | 2                                                                                                      | Ex5 c.376 T>A Y126N          |
| RELB_107 | 46          | 1                                      | 20              | 0                      | 132            | 0                                                      | 1                                                                                | 1                                                                      | 2                                                  | 0                                                                                                                    | 7                                                    | luminal A                                                                                                                                                                                            | d                 | 0                   | 49                          | 0.21                                   | 2                                | 0                                                                              | 0                                                                                                      |                              |
| RELB_108 | 66          | 3                                      | 25              | 1                      | 11             | 1                                                      | 0                                                                                | 0                                                                      | 4                                                  | 3                                                                                                                    | 12                                                   | Her2-enriched                                                                                                                                                                                        | a                 | 2                   | 76                          | 0.26                                   | 2                                | 1                                                                              | 0                                                                                                      |                              |
| RELB_109 | 34          | 2                                      | 13              | 0                      | 132            | 1                                                      | 1                                                                                | 1                                                                      | 3                                                  | 3                                                                                                                    | 15                                                   | luminal B                                                                                                                                                                                            | e                 | 6                   | 65                          | 0.24                                   | 2                                | 0                                                                              | 0                                                                                                      |                              |
| RELB_110 | 45          | 3                                      | 10              | 0                      | 132            | 0                                                      | 1                                                                                | 0                                                                      | 3                                                  | 0                                                                                                                    | 23                                                   | Luminal B                                                                                                                                                                                            | c                 | 2                   | 79                          | 0.32                                   | 2                                | 0                                                                              | 1                                                                                                      | Ex4 c.375delG T125fsX45      |
| RELB_111 | 48          | 2                                      | 13              | 0                      | 132            | 0                                                      | 1                                                                                | 1                                                                      | 3                                                  | 0                                                                                                                    | 22                                                   | Luminal B                                                                                                                                                                                            | c                 | 2                   | 44                          | 0.27                                   | 2                                | 0                                                                              | 0                                                                                                      |                              |
| RELB_112 | 59          | 2                                      | 25              | 1                      | 108            | 1                                                      | 1                                                                                | 1                                                                      | 4                                                  | 0                                                                                                                    | 11                                                   | luminal A                                                                                                                                                                                            | e                 | 0                   | 45                          | 0.19                                   | 2                                | 0                                                                              | 0                                                                                                      |                              |
| RELB_113 | 49          | 3                                      | 30              | 0                      | 132            | 1                                                      | 1                                                                                | 1                                                                      | 4                                                  | 0                                                                                                                    | 35                                                   | Luminal B                                                                                                                                                                                            | a                 | 3                   | 43                          | 0.20                                   | 2                                | 1                                                                              | 2                                                                                                      | Ex7 c.712 T>C C238R          |
| RELB_114 | 48          | 3                                      | 15              | 0                      | 132            | 1                                                      | 1                                                                                | 1                                                                      | 3                                                  | 3                                                                                                                    | 35                                                   | Luminal B                                                                                                                                                                                            | d                 | 3                   | 73                          | 0.26                                   | 2                                | 0                                                                              | 1                                                                                                      | Ex4 c.210insC                |
| RELB_115 | 43          | 2                                      | 8               | 1                      | 132            | 0                                                      | 1                                                                                | 1                                                                      | 2                                                  | 0                                                                                                                    | 30                                                   | Luminal B                                                                                                                                                                                            | c                 | 3                   | 45                          | 0.24                                   | 2                                | 0                                                                              | 0                                                                                                      |                              |
| RELB_116 | 66          | 3                                      | 30              | 0                      | 132            | 1                                                      | 1                                                                                | 1                                                                      | 4                                                  | 0                                                                                                                    | 21                                                   | Luminal B                                                                                                                                                                                            | b                 | 0                   | 55                          | 0.09                                   | 2                                | 0                                                                              | 0                                                                                                      |                              |
| RELB_117 | 59          | 2                                      | 30              | 0                      | 132            | 1                                                      | 1                                                                                | 1                                                                      | 3                                                  | 0                                                                                                                    | 7                                                    | luminal A                                                                                                                                                                                            | b                 | 0                   | 33                          | 0.17                                   | 1                                | 0                                                                              | 0                                                                                                      |                              |
| RELB_118 | 69          | 2                                      | 13              | 0                      | 132            | 0                                                      | 1                                                                                | 1                                                                      | 2                                                  | 0                                                                                                                    | 13                                                   | luminal A                                                                                                                                                                                            | a                 | 0                   | 40                          | 0.15                                   | 1                                | 0                                                                              | 0                                                                                                      |                              |
| RELB_119 | 36          | 1                                      | 10              | 0                      | 132            | 0                                                      | 1                                                                                | 1                                                                      | 2                                                  | 0                                                                                                                    | 5                                                    | luminal A                                                                                                                                                                                            | b                 | 0                   | 49                          | 0.15                                   | 2                                | 1                                                                              | 2                                                                                                      | Ex10 c.1025 G>C R342P        |
| RELB_120 | 40          | 2                                      | 23              | 0                      | 132            | 0                                                      | 1                                                                                | 1                                                                      | 3                                                  | 0                                                                                                                    | 4                                                    | luminal A                                                                                                                                                                                            | b                 | 0                   | 56                          | 0.17                                   | 2                                | 0                                                                              | 0                                                                                                      |                              |
| RELB_121 | 60          | 1                                      | 8               | 1                      | 95             | 0                                                      | 1                                                                                | 1                                                                      | 2                                                  | 0                                                                                                                    | 7                                                    | luminal A                                                                                                                                                                                            | f                 | 1                   | 95                          | 0.62                                   | 3                                | 0                                                                              | 0                                                                                                      |                              |
| RELB_122 | 52          | 2                                      | 18              | 0                      | 132            | 0                                                      | 1                                                                                | 1                                                                      | 2                                                  | 0                                                                                                                    | 10                                                   | luminal A                                                                                                                                                                                            | a                 | 1                   | 70                          | 0.44                                   | 3                                | 0                                                                              | 0                                                                                                      |                              |
| RELB_123 | 72          | 2                                      | 18              | 0                      | 132            | 0                                                      | 1                                                                                | 1                                                                      | 2                                                  | 0                                                                                                                    | 11                                                   | luminal A                                                                                                                                                                                            | a                 | 0                   | 33                          | 0.12                                   | 1                                | 0                                                                              | 0                                                                                                      |                              |
| RELB_124 | 37          | 2                                      | 12              | 1                      | 88             | 0                                                      | 1                                                                                | 1                                                                      | 2                                                  | 0                                                                                                                    | 13                                                   | luminal A                                                                                                                                                                                            | c                 | 1                   | 54                          | 0.19                                   | 2                                | 0                                                                              | 0                                                                                                      |                              |
| RELB_125 | 52          | 3                                      | 20              | 1                      | 17             | 1                                                      | 0                                                                                | 0                                                                      | 3                                                  | 3                                                                                                                    | 23                                                   | Her2-enriched                                                                                                                                                                                        | d                 | 3                   | 53                          | 0.27                                   | 2                                | 0                                                                              | 0                                                                                                      |                              |
| RELB_126 | 69          | 3                                      | 23              | 1                      | 21             | 0                                                      | 1                                                                                | 1                                                                      | 3                                                  | 0                                                                                                                    | 10                                                   | luminal A                                                                                                                                                                                            | f                 | 10                  | 127                         | 0.62                                   | 3                                | 1                                                                              | 2                                                                                                      | Ex8 839 G>T R280I            |
| RELB_127 | 70          | 3                                      | 13              | 0                      | 132            | 0                                                      | 1                                                                                | 1                                                                      | 3                                                  | 0                                                                                                                    | 65                                                   | Luminal B                                                                                                                                                                                            | e                 | 6                   | 74                          | 0.40                                   | 3                                | 0                                                                              | 0                                                                                                      |                              |
| RELB_128 | 42          | 1                                      | 20              | 0                      | 132            | 1                                                      | 1                                                                                | 1                                                                      | 3                                                  | 0                                                                                                                    | 5                                                    | luminal A                                                                                                                                                                                            | d                 | 0                   | 62                          | 0.15                                   | 2                                | 0                                                                              | 0                                                                                                      |                              |
| RELB_129 | 55          | 2                                      | 15              | 1                      | 124            | 1                                                      | 1                                                                                | 1                                                                      | 3                                                  | 0                                                                                                                    | 18                                                   | luminal A                                                                                                                                                                                            | d                 | 2                   | 58                          | 0.24                                   | 2                                | 1                                                                              | 2                                                                                                      | Ex5 c.473 G>T R158L          |
| RELB_130 | 54          | 2                                      | 20              | 1                      | 10             | 0                                                      | 1                                                                                | 0                                                                      | 3                                                  | 0                                                                                                                    | 11                                                   | luminal A                                                                                                                                                                                            | f                 | 7                   | 76                          | 0.42                                   | 3                                | 1                                                                              | 0                                                                                                      |                              |
| RELB_131 | 29          | 2                                      | 19              | 1                      | 7              | 1                                                      | 1                                                                                | 1                                                                      | 3                                                  | 0                                                                                                                    | 17                                                   | luminal A                                                                                                                                                                                            | a                 | 5                   | 62                          | 0.29                                   | 2                                | 1                                                                              | 2                                                                                                      | Ex5 c.488 A>G Y163C          |
| RELB_132 | 44          | 1                                      | 15              | 0                      | 132            | 1                                                      | 1                                                                                | 1                                                                      | 3                                                  | 1                                                                                                                    | 5                                                    | luminal A                                                                                                                                                                                            | f                 | 0                   | 97                          | 0.41                                   | 3                                | 1                                                                              | 2                                                                                                      | Ex5 c.484 A>T I162F          |
| RELB_133 | 43          | 3                                      | 25              | 0                      | 132            | 1                                                      | 1                                                                                | 1                                                                      | 3                                                  | 0                                                                                                                    | 26                                                   | Luminal B                                                                                                                                                                                            | e                 | 7                   | 56                          | 0.31                                   | 2                                | 1                                                                              | 0                                                                                                      |                              |
| RELB_134 | 75          | 3                                      | 30              | 1                      | 17             | 0                                                      | 1                                                                                | 0                                                                      | 3                                                  | 0                                                                                                                    | 40                                                   | Luminal B                                                                                                                                                                                            | f                 | 8                   | 116                         | 0.36                                   | 3                                | 0                                                                              | 1                                                                                                      |                              |
| RELB_135 | 65          | 2                                      | 30              | 0                      | 132            | 1                                                      | 1                                                                                | 0                                                                      | 4                                                  | 1                                                                                                                    | 17                                                   | luminal A                                                                                                                                                                                            | b                 | 3                   | 70                          | 0.34                                   | 2                                | 0                                                                              | 0                                                                                                      | Ex4 c.297_304del8 Q100X46    |

(a) cases in grey indicate tumors with available transcriptomic data as well

(b) IHC: immunohistochemical data

Supplementary table 2: Incidence of the most frequent genomic gains and losses with respect to array CGH clusters

| extent of copy number change <sup>(a)</sup> | chromosome band | genomic start position <sup>(b)</sup> | genomic end position <sup>(b)</sup> | status <sup>(c)</sup> | cluster a <sup>(d)</sup> | cluster b <sup>(d)</sup> | cluster c <sup>(d)</sup> | cluster d <sup>(d)</sup> | cluster e <sup>(d)</sup> | Gene ID or CNV | Gene description                                                                | regions with amplicons                                                                                                                                                                                                                                                                                                      |                           |
|---------------------------------------------|-----------------|---------------------------------------|-------------------------------------|-----------------------|--------------------------|--------------------------|--------------------------|--------------------------|--------------------------|----------------|---------------------------------------------------------------------------------|-----------------------------------------------------------------------------------------------------------------------------------------------------------------------------------------------------------------------------------------------------------------------------------------------------------------------------|---------------------------|
| chromosome arm                              | 1p36.3-p34.3    | 849544                                | 37432287                            | L                     |                          |                          |                          |                          | 68                       |                |                                                                                 |                                                                                                                                                                                                                                                                                                                             |                           |
|                                             | 1q21-q44: +1q   | 142714793                             | 245406794                           | G                     |                          | 97                       | 76                       |                          | 69                       |                |                                                                                 |                                                                                                                                                                                                                                                                                                                             |                           |
|                                             | 7p22-p11.1      | 188237                                | 57330946                            | G                     |                          |                          |                          | 73                       |                          |                |                                                                                 |                                                                                                                                                                                                                                                                                                                             |                           |
|                                             | 7q11.2-q36      | 65773246                              | 158457674                           | G                     |                          |                          |                          | 80                       |                          |                |                                                                                 |                                                                                                                                                                                                                                                                                                                             |                           |
|                                             | 8p23-p12        | 139851                                | 34482284                            | L                     |                          |                          |                          |                          | 79                       |                |                                                                                 |                                                                                                                                                                                                                                                                                                                             |                           |
|                                             | 8q11.2-q24.3    | 48064196                              | 146133391                           | G                     |                          |                          |                          |                          | 99                       | 73             |                                                                                 |                                                                                                                                                                                                                                                                                                                             |                           |
|                                             | 16p13.3-p11.2   | 86672                                 | 33714444                            | G                     |                          |                          |                          |                          | 71                       |                |                                                                                 |                                                                                                                                                                                                                                                                                                                             |                           |
|                                             | 16q12.2-q24.3   | 51142912                              | 88643387                            | L                     |                          | 66                       |                          |                          | 85                       | 64             |                                                                                 |                                                                                                                                                                                                                                                                                                                             |                           |
| 17p13-p11.2                                 | 343376          | 16463340                              | L                                   |                       |                          |                          |                          | 69                       |                          |                |                                                                                 |                                                                                                                                                                                                                                                                                                                             |                           |
| chromosome bands                            | 1p21            | 103873135                             | 104049562                           | L                     |                          |                          |                          |                          | 65                       | 71             | CNV                                                                             |                                                                                                                                                                                                                                                                                                                             |                           |
|                                             | 1p12-p11        | 120102485                             | 121114115                           | G                     |                          | 61                       |                          |                          |                          |                | CNV                                                                             | 1p12                                                                                                                                                                                                                                                                                                                        |                           |
|                                             | 4q35            | 185584237                             | 185711000                           | G                     |                          |                          |                          |                          |                          | 63             | IRF2                                                                            | interferon regulatory factor 2.                                                                                                                                                                                                                                                                                             |                           |
|                                             | 5p14            | 28156567                              | 28338015                            | G                     |                          |                          |                          | 62                       | 69                       | -              |                                                                                 |                                                                                                                                                                                                                                                                                                                             |                           |
|                                             | 5p14-p13        | 28714271                              | 29957832                            | G                     |                          |                          |                          |                          | 61                       | PGBD3P2        | piggyBac transposable element derived 3 pseudogene 2                            |                                                                                                                                                                                                                                                                                                                             |                           |
|                                             | 6q16            | 100062194                             | 100133623                           | L                     |                          |                          |                          |                          |                          | 63             | CCNC                                                                            | Cyclin C                                                                                                                                                                                                                                                                                                                    |                           |
|                                             | 6q27            | 170751274                             | 170928001                           | L                     |                          |                          |                          |                          | 62                       |                | CNV                                                                             |                                                                                                                                                                                                                                                                                                                             |                           |
|                                             | 8p12-8q11.1     | 36653064                              | 47198510                            | G                     |                          |                          |                          |                          | 70                       |                | various including FGFR1<br>LETM2<br>WHSC1L1                                     | fibroblaste growth factor receptor 1.<br>Leucine zipper-EF-hand containing transmembrane protein 2.<br>Wolf-Hirschhorn syndrome candidate 1-Like 1                                                                                                                                                                          | 8p12 a et b ; 8p12-p11.21 |
|                                             | 11q23-q24       | 111814998                             | 125748324                           | L                     |                          |                          |                          |                          |                          | 71             | various                                                                         |                                                                                                                                                                                                                                                                                                                             |                           |
|                                             | 12p13           | 12118026                              | 12281072                            | L                     |                          |                          | 63                       | 69                       | 63                       |                | BCL2L14<br>LRP6                                                                 | BCL2-like 14 (apoptosis facilitator)<br>low density lipoprotein receptor-related protein 6                                                                                                                                                                                                                                  |                           |
|                                             | 12q13           | 47263899                              | 47441000                            | G                     |                          |                          |                          |                          | 85                       |                | SNORA34;2A;2B<br>CCNT1                                                          | small nucleolar RNA, H/ACA box 34/2A/2B<br>Cycline T1.                                                                                                                                                                                                                                                                      | 12q13.11-13.12            |
|                                             | 12q15           | 68555132                              | 68606932                            | G                     |                          |                          |                          |                          | 62                       |                | -                                                                               |                                                                                                                                                                                                                                                                                                                             | 12q14.3-15                |
|                                             | 12q21           | 83977453                              | 84060921                            | G                     |                          |                          |                          |                          |                          | 63             | LRRIQ1                                                                          | leucine-rich repeats and IQ motif containing 1                                                                                                                                                                                                                                                                              | 12q21.31                  |
|                                             | 13q34           | 112494932                             | 113999977                           | L                     |                          |                          |                          |                          | 62                       |                | GRK1<br>GAS1<br>CUL4A<br>LAMP1<br>GRTP1<br>ADPRHL1<br>DCUN1D2<br>TFDP1<br>MCF2L | Growth arrest specific gene1<br>growth arrest-specific 1<br>Culin 4A<br>lysosomal-associated membrane protein 1<br>growth hormone regulated TBC protein 1.<br>ADP-ribosylhydrolase like 1<br>defective in cullin neddylation 1, domain containing 2<br>transcription factor Dp-1<br>MCF2-transforming sequence-like protein |                           |
|                                             | 15q22           | 61968824                              | 62119201                            | G                     |                          |                          |                          |                          | 69                       |                | DAPK2                                                                           | death-associated protein kinase 2                                                                                                                                                                                                                                                                                           | 15q22.2-q24.1             |
|                                             | 16p13.3         | 2779832                               | 4641451                             | G                     |                          |                          |                          |                          | 62                       | 63             | various                                                                         |                                                                                                                                                                                                                                                                                                                             |                           |
|                                             | 16q12.1         | 45874737                              | 50094137                            | L                     |                          |                          | 64                       |                          | 72                       | 57             | -                                                                               |                                                                                                                                                                                                                                                                                                                             |                           |
|                                             | 17p13           | 7420977                               | 7542427                             | L                     |                          |                          |                          |                          | 77                       |                | TP53                                                                            |                                                                                                                                                                                                                                                                                                                             |                           |
|                                             | 17p13           | 7564112                               | 13199220                            | L                     |                          | 64                       |                          |                          | 73                       |                | various (PIK3R6)                                                                |                                                                                                                                                                                                                                                                                                                             |                           |
|                                             | 17q11.2         | 23926254                              | 24057738                            | G                     |                          |                          |                          |                          | 77                       | 69             | SDF2                                                                            | stromal cell-derived factor 2                                                                                                                                                                                                                                                                                               | 17q11.1-q11.2 ; 17q11.2   |
| 17q12                                       | 29835217        | 29998785                              | L                                   |                       |                          |                          |                          | 62                       | 62                       | TMEM132E       | unknown function                                                                |                                                                                                                                                                                                                                                                                                                             |                           |
| 22q11.22                                    | 21211077        | 21411364                              | L                                   |                       |                          |                          | 63                       |                          |                          | CNV            |                                                                                 |                                                                                                                                                                                                                                                                                                                             |                           |
| Xp11.1                                      | 58201229        | 58374974                              | L                                   |                       | 62                       | 60                       | 81                       | 77                       | 77                       | CNV            |                                                                                 |                                                                                                                                                                                                                                                                                                                             |                           |

(a) extent of region with copy number change detected in at least 60% of tumors in a cluster, involving either a chromosome arm or a chromosome band

(b) genomic start or end position on the March 2006 human reference sequence (NCBI Build 36.1/Hg18)

(c) genomic status: L: loss or G: gain

Supplementary table 3: description of the amplicons

| chromosome band | genomic start position <sup>(b)</sup> | genomic end position <sup>(b)</sup> | genes                                                                                 | Description of genes                                                                                                                                                                                                                                                                                                                                                                                                                                                          | total number of tumors | number of G2I-3 tumors |
|-----------------|---------------------------------------|-------------------------------------|---------------------------------------------------------------------------------------|-------------------------------------------------------------------------------------------------------------------------------------------------------------------------------------------------------------------------------------------------------------------------------------------------------------------------------------------------------------------------------------------------------------------------------------------------------------------------------|------------------------|------------------------|
| 1p31.1          | 75168912                              | 75597275                            | LHX8                                                                                  | LIM homeobox 8: Members of the LIM homeobox gene family                                                                                                                                                                                                                                                                                                                                                                                                                       | 1                      | 1                      |
| 1p12            | 119870149                             | 120037535                           | ZNF697                                                                                | zinc finger protein 697                                                                                                                                                                                                                                                                                                                                                                                                                                                       | 1                      | 0                      |
| 1q31.1-q31.2    | 188885607                             | 190865412                           | RGS18 /RGS1 RGS21                                                                     | regulator of G-protein signaling 18/1/21                                                                                                                                                                                                                                                                                                                                                                                                                                      | 1                      | 0                      |
| 1q32.1          | 201346093                             | 202047453                           | ADORA1 - MYBPH<br>CHI3L1- CHIT1<br>BTG2 - FMOD<br>PRELP-OPTC-ATP2B4<br>SNORA77 - LAX1 | Adenosine A1 receptor-proline/arginine-rich end leucine-rich repeat protein - Myosin binding protein H<br>Chitinase 3-like 1 (cartilage glycoprotein-39) - chitinase 1 (chitotriosidase)<br>B-cell translocation gene 2: member of the BTG/Tob family - Fibromodulin<br>Proline/arginine-rich end leucine-rich repeat protein - Opticin - ATPase, Ca <sup>++</sup> transporting, plasma membrane 4.<br>Small nucleolar RNA, H/ACA box 77 - Lymphocyte transmembrane adaptor 1 | 2                      | 2                      |
| 3q25.33-q26.1   | 160964752                             | 163801017                           | SCHIP1 - IL12<br>IFT80 - SMC4<br>TRIM59 - ARL14<br>B3GALNT1 - NMD3                    | Schwannomin interacting protein 1 - intraflagellar transport 80 homolog (Chlamydomonas) - Interleukine 12<br>Intraflagellar transport 80 homolog (Chlamydomonas) - Structural maintenance of chromosomes 4<br>Tripartite motif-containing 59 or RING finger 1-like - ADP-ribosylation factor-like 14.<br>Beta-1,3-N-acetylgalactosaminyltransferase 1 (globoside blood group) - NMD3 homolog:                                                                                 | 1                      | 1                      |
| 3q26.2-q26.31   | 171682715                             | 173687438                           | EIF5A2<br>TNIK<br>PLD1 - FNDC3B                                                       | Eukaryotic translation initiation factor 5A2<br>TRAF2 and NCK interacting kinase Stress-activated serine/threonine kinase<br>Phospholipase D1, phosphatidylcholine-specific - Factor for adipocyte differentiation 104                                                                                                                                                                                                                                                        | 1                      | 0                      |
| 4q13.3-q21.1    | 75062607                              | 76647213                            | PF4 - PPBP<br>CXCL 3/2/5<br>MTHFD2L<br>EPGN - EREG<br>AREG - BTC                      | Platelet factor 4 (chemokine (C-X-C motif) ligand 4) - Pro-platelet basic protein (chemokine (C-X-C motif) ligand 7)<br>Chemokine (C-X-C motif) ligand 3 / 2 / 5<br>Methylenetetrahydrofolate dehydrogenase (NADP+ dependent) 2-like protein.<br>Epithelial mitogen homolog (mouse) - Epreguin<br>Amphiregulin (schwannoma-derived growth factor)/Colorectum cell-derived growth factor 2, 3 - Betacellulin                                                                   | 2                      | 2                      |
| 4q22.1          | 90883958                              | 91062845                            | SNCA - MMRN1                                                                          | Synuclein, alpha (non A4 component of amyloid precursor) - Multimerin 1                                                                                                                                                                                                                                                                                                                                                                                                       | 1                      | 1                      |
| 5p13.2-p13.1    | 38484979                              | 38621958                            | EGFLAM - LIFR                                                                         | EGF-like, fibronectin type III and laminin G domains - leukemia inhibitory factor receptor alpha                                                                                                                                                                                                                                                                                                                                                                              | 1                      | 1                      |
| 5q23.3          | 130203672                             | 130353918                           | -                                                                                     | -                                                                                                                                                                                                                                                                                                                                                                                                                                                                             | 7                      | 2                      |
| 5q32            | 146744398                             | 146950721                           | DPYSL3                                                                                | Dihydropyrimidinase-like 3                                                                                                                                                                                                                                                                                                                                                                                                                                                    | 2                      | 0                      |
| 6p24.3          | 9358225                               | 9645938                             | no known gene                                                                         | -                                                                                                                                                                                                                                                                                                                                                                                                                                                                             | 1                      | 0                      |
| 6q14.1          | 76118239                              | 76312627                            | FILIP1                                                                                | Filamin A interacting protein 1                                                                                                                                                                                                                                                                                                                                                                                                                                               | 1                      | 0                      |
| 6q21            | 106587688                             | 106737871                           | PRDM1                                                                                 | PR domain containing 1, with ZNF domain                                                                                                                                                                                                                                                                                                                                                                                                                                       | 3                      | 0                      |
| 6q25.1-q25.2    | 151052348                             | 153696621                           | ESR1 - MYCT1 - SYNE1                                                                  | Estrogen receptor 1 - Myc target 1 - Synaptic nuclear envelope protein 1                                                                                                                                                                                                                                                                                                                                                                                                      | 4                      | 2                      |
| 7p15.1          | 29729747                              | 29911984                            | WIPF3                                                                                 | WAS/WASL interacting protein family, member 3                                                                                                                                                                                                                                                                                                                                                                                                                                 | 1                      | 1                      |
| 8p12 a          | 37693145                              | 37847478                            | ERLIN2 - PROSC - BRF2<br>RAB11FIP1                                                    | ER lipid raft associated 2 - Proline synthetase co-transcribed homolog (bacterial) - B-related factor 2<br>RAB11 family interacting protein 1 (class I)                                                                                                                                                                                                                                                                                                                       | 11                     | 3                      |
| 8p12 b          | 38300020                              | 38523430                            | WHSC1L1 - LETM2<br>FGFR1                                                              | Wolf-Hirschhorn syndrome candidate 1-like 1 - Leucine zipper-EF-hand containing transmembrane protein 2<br>Fibroblast growth factor receptor 1                                                                                                                                                                                                                                                                                                                                | 5                      | 3                      |
| 8p12-p11.21     | 38388454                              | 42044320                            | FGFR1 - TACC1<br>PLEKHA2<br>HTRA4 - TM2D2<br>ADAM9/32/2/18/3A<br>INDOL1 - ZMAT4       | Fibroblast growth factor receptor 1 - Transforming, acidic coiled-coil containing protein 1<br>Pleckstrin homology domain containing, family A (phosphoinositide binding specific) member 2<br>HtrA serine peptidase 4 - TM2 domain containing 2<br>ADAM metallopeptidase domain 9/32/2/18/3A - indoleamine-pyrrole 2,3 dioxygenase-like 1<br>Zinc finger, matrix type 4                                                                                                      | 10                     | 2                      |
| 8q12.1          | 55683872                              | 58525613                            | PLAG1                                                                                 | pleiomorphic adenoma gene 1                                                                                                                                                                                                                                                                                                                                                                                                                                                   | 2                      | 1                      |
| 8q12.1-q12.2    | 61251559                              | 61910067                            | CA8 - RAB2 - CDH7                                                                     | Carbonic anhydrase VIII - RAB2A, member RAS oncogene family - Cadherin 7, type 2                                                                                                                                                                                                                                                                                                                                                                                              | 4                      | 2                      |
| 8q13.1          | 66269708                              | 67850992                            | PDE7A - MYBL1                                                                         | Phosphodiesterase 7A - Nucleotides v-myc myeloblastosis viral oncogene homolog (avian)-like 1                                                                                                                                                                                                                                                                                                                                                                                 | 5                      | 2                      |
| 8q21.11         | 75821214                              | 75921964                            | PI15                                                                                  | peptidase inhibitor 15                                                                                                                                                                                                                                                                                                                                                                                                                                                        | 5                      | 2                      |
| 8q21.13         | 80408445                              | 81648505                            | STMN2 - HEY1 - TPD52                                                                  | Stathmin-like 2 - Hairly/enhancer-of-split related with YRPW motif 1 - tumor protein D52                                                                                                                                                                                                                                                                                                                                                                                      | 4                      | 2                      |
| 8q22.1          | 94050592                              | 97062466                            | CDH17 - RAD54B                                                                        | cadherin 17, LI cadherin (liver-intestine) - RAD54 homolog B (S. cerevisiae)                                                                                                                                                                                                                                                                                                                                                                                                  | 6                      | 3                      |
| 8q22.3          | 102004873                             | 102268102                           | YWHAZ                                                                                 | Tyrosine 3-monooxygenase/tryptophan 5-monooxygenase activation protein, zeta polypeptide                                                                                                                                                                                                                                                                                                                                                                                      | 3                      | 2                      |
| 8q23.3-q24.11   | 116334757                             | 118046959                           | TRPS1 - EIF3H - RAD21                                                                 | Trichorhinophalangeal syndrome I - RAD21 homolog (S. pombe)                                                                                                                                                                                                                                                                                                                                                                                                                   | 5                      | 1                      |
| 8q24.11-q24.12  | 119096485                             | 120383226                           | EXT1 - SAMD12<br>TNFRSF11B - COLEC10                                                  | Exostososes (multiple) 1 - Sterile alpha motif domain containing 12<br>Tumor necrosis factor receptor superfamily, member 11b - Collectin sub-family member 10 (C-type lectin)                                                                                                                                                                                                                                                                                                | 5                      | 3                      |
| 8q24.13         | 123818644                             | 124908744                           | DERL1 - WDR67 - ZHX1<br>ATAD2-MIRN548D1 - FBOXO32<br>ANX13                            | Der1-like domain family, member 1 - WD repeat domain 67 - Zinc fingers and homeoboxes 1<br>ATPase family, AAA domain containing 2 - F-box only protein 32<br>Annexin A13                                                                                                                                                                                                                                                                                                      | 6                      | 3                      |
| 8q24.21         | 127636652                             | 129086494                           | POU5F1 - MYC                                                                          | POU class 3 homeobox 1 - V-myc myelocytomatosis viral oncogene homolog (avian)                                                                                                                                                                                                                                                                                                                                                                                                | 6                      | 3                      |
| 8q24.23         | 138579417                             | 138778374                           | no known gene                                                                         | -                                                                                                                                                                                                                                                                                                                                                                                                                                                                             | 4                      | 2                      |

Supplementary table 3: description of the amplicons

| chromosome band | genomic start position <sup>(b)</sup> | genomic end position <sup>(b)</sup> | genes                                                                        | Description of genes                                                                                                                                                                                                                                                                                                                                                                                                                                                                                                            | total number of tumors | number of G2I-3 tumors |
|-----------------|---------------------------------------|-------------------------------------|------------------------------------------------------------------------------|---------------------------------------------------------------------------------------------------------------------------------------------------------------------------------------------------------------------------------------------------------------------------------------------------------------------------------------------------------------------------------------------------------------------------------------------------------------------------------------------------------------------------------|------------------------|------------------------|
| 10p12.31        | 22567924                              | 22718252                            | COMD3 - BMI1 - SPAG6                                                         | COMM domain containing 3 - BMI1 polycomb ring finger oncogene - Sperm associated antigen 6                                                                                                                                                                                                                                                                                                                                                                                                                                      | 2                      | 1                      |
| 10q22.2-q22.3   | 79296990                              | 80682870                            | DLG5 - RPS24 - POLR3A ZMIZ1                                                  | Discs large (DLG) homolog 5 - Ribosomal protein S24 - Polymerase (RNA) III (DNA directed) polypeptide A, 155kDa<br>Zinc finger, MIZ-type containing 1                                                                                                                                                                                                                                                                                                                                                                           | 3                      | 0                      |
| 10q26.12-q26.13 | 123070217                             | 123327360                           | FGFR2                                                                        | Fibroblast growth factor receptor 2/BEK fibroblast growth factor receptor                                                                                                                                                                                                                                                                                                                                                                                                                                                       | 2                      | 2                      |
| 11q13.2-q13.3   | 68992359                              | 69494732                            | CCND1 - ORAOV1 - FGF19/4/3                                                   | Cyclin D1 - Oral cancer overexpressed 1 - Fibroblast growth factor 19 / 4/3                                                                                                                                                                                                                                                                                                                                                                                                                                                     | 18                     | 8                      |
| 11q13.4         | 74417463                              | 74580541                            | ORO2AT4 - SLCO2B1                                                            | Olfactory receptor, family 2, subfamily AT, member 4 - Solute carrier organic anion transporter family, member 2B1                                                                                                                                                                                                                                                                                                                                                                                                              | 3                      | 1                      |
| 11q14.1 a       | 76964811                              | 78581745                            | RSF1 - INTS4 - THRSP KCTD14/21<br>NDUFC2<br>ALG8<br>USP35-GAB2<br>NARS2-ODZ4 | Remodeling and spacing factor 1 - Integrator complex subunit 4 - Thyroid hormone responsive (SPOT14 homolog, rat)<br>Potassium channel tetramerisation domain containing 14/21<br>NADH dehydrogenase (ubiquinone) 1, subcomplex unknown, 2, 14.5kDaU<br>Asparagine-linked glycosylation 8 homolog (S. cerevisiae, alpha-1,3-glucosyltransferase)<br>Ubiquitin specific peptidase 35 - GRB2-associated binding protein 2 -<br>Asparaginyl-tRNA synthetase 2, mitochondrial (putative) - Odz, odd Oz/ten-m homolog 4 (Drosophila) | 11                     | 3                      |
| 11q14.1 b       | 83623372                              | 83798264                            | DLG2                                                                         | Discs, large homolog 2, chapsyn-110 (Drosophila)                                                                                                                                                                                                                                                                                                                                                                                                                                                                                | 3                      | 1                      |
| 12q13.11-q13.12 | 47263899                              | 47441000                            | SNORA34/2A/2B - CCNT1                                                        | Small nucleolar RNA, H/ACA box 34/box2A - Cyclin T1                                                                                                                                                                                                                                                                                                                                                                                                                                                                             | 7                      | 3                      |
| 12q14.1         | 57120242                              | 57335694                            | no known gene                                                                | -                                                                                                                                                                                                                                                                                                                                                                                                                                                                                                                               | 5                      | 1                      |
| 12q14.3         | 63783753                              | 63965033                            | WIF1-LEMD3                                                                   | WNT inhibitory factor 1 - LEM domain containing 3                                                                                                                                                                                                                                                                                                                                                                                                                                                                               | 4                      | 1                      |
| 12q14.3-q15     | 65848908                              | 68135237                            | IFNG - IL26/22 - MDM1<br>MDM2 - RAP1B - NUP107                               | Interferon, gamma - Interleukin 26/ 22 - Mdm1 nuclear protein homolog (mouse)<br>Mdm2 p53 binding protein homolog (mouse) - RAP1B, member of RAS oncogene family - Nucleoporin 107kDa                                                                                                                                                                                                                                                                                                                                           | 2                      | 1                      |
| 12q21.31        | 80805511                              | 80952302                            | no known gene                                                                | -                                                                                                                                                                                                                                                                                                                                                                                                                                                                                                                               | 3                      | 1                      |
| 12q23.3         | 102794652                             | 102924148                           | HSP90B1 - TDG                                                                | Heat shock protein 90kDa beta (Grp94), member - Thymine-DNA glycosylase                                                                                                                                                                                                                                                                                                                                                                                                                                                         | 2                      | 1                      |
| 12q24.21        | 114829821                             | 114989740                           | MED13L                                                                       | Mediator complex subunit 13-like                                                                                                                                                                                                                                                                                                                                                                                                                                                                                                | 1                      | 0                      |
| 12q24.31-q24.32 | 124397339                             | 126794741                           | no known gene                                                                | -                                                                                                                                                                                                                                                                                                                                                                                                                                                                                                                               | 1                      | 0                      |
| 14q24.3         | 74759155                              | 74937247                            | FOS                                                                          | v-fos FBJ murine osteosarcoma viral oncogene homolog                                                                                                                                                                                                                                                                                                                                                                                                                                                                            | 4                      | 1                      |
| 15q21.1         | 45554908                              | 45746131                            | SEMA6D                                                                       | Sema domain, transmembrane domain (TM), and cytoplasmic domain, (semaphorin) 6D                                                                                                                                                                                                                                                                                                                                                                                                                                                 | 4                      | 0                      |
| 15q22.2-q24.1   | 58718485                              | 71072936                            | various                                                                      | -                                                                                                                                                                                                                                                                                                                                                                                                                                                                                                                               | 1                      | 0                      |
| 15q25.2-q26.1   | 79990533                              | 91436501                            | various                                                                      | -                                                                                                                                                                                                                                                                                                                                                                                                                                                                                                                               | 1                      | 1                      |
| 15q26.2-q26.3   | 95572059                              | 97894328                            | ARRDC4 - IGF1R                                                               | Arrestin domain containing 4 - Insulin-like growth factor 1 receptor                                                                                                                                                                                                                                                                                                                                                                                                                                                            | 4                      | 0                      |
| 16q12.1         | 47239429                              | 47397252                            | no known gene                                                                | -                                                                                                                                                                                                                                                                                                                                                                                                                                                                                                                               | 2                      | 1                      |
| 17q11.1-11.2    | 22685650                              | 23921094                            | KSR1 - LGALS9 - NOS2A<br>NLK - PPY2 - TNFAIP1<br>POLDIP2 - SEBOX - VTN       | Kinase suppressor of ras 1 - Lectin, galactoside-binding, soluble, 9 - Nitric oxide synthase 2A (inducible, hepatocytes)<br>Nemo-like kinase<br>Pancreatic polypeptide 2 - Tumor necrosis factor, alpha-induced protein 1 (endothelial)<br>Polymerase (DNA-directed), delta interacting protein 2 - SEBOX homeobox - Vitronectin/Somatomedin-B                                                                                                                                                                                  | 2                      | 1                      |
| 17q11.2         | 23926254                              | 24057738                            | SPAG5 - BCOX - FDF2                                                          | Sperm-associated antigen 5 - Breast cancer overexpressed gene 1 protein - Stromal cell-derived factor 2                                                                                                                                                                                                                                                                                                                                                                                                                         | 6                      | 3                      |
| 17q12 a         | 31786567                              | 31974170                            | TBC1D3G - ZNHIT3_MYO19                                                       | TBC1 domain family, member 3G - Zinc finger, HIT type 3 - Myosin 19                                                                                                                                                                                                                                                                                                                                                                                                                                                             | 3                      | 2                      |
| 17q12 b         | 32855270                              | 32991115                            | TADA2L - DUSP14<br>AP1GBP1                                                   | Transcriptional adaptor 2 (ADA2 homolog, yeast)-like - Dual specificity phosphatase 14/MAP kinase phosphatase 6<br>AP1 gamma subunit binding protein 1                                                                                                                                                                                                                                                                                                                                                                          | 4                      | 1                      |
| 17q12 c         | 32964235                              | 33147865                            | AP1GBP1 - DDX52 - HNF1B                                                      | AP1 gamma subunit binding protein 1 - DEAD (Asp-Glu-Ala-Asp) box polypeptide 52/ATP-dependent RNA helicase - HNF1                                                                                                                                                                                                                                                                                                                                                                                                               | 3                      | 2                      |
| 17q12 d         | 34054485                              | 34434812                            | MLLT6<br>PCGF2 - PSMB3<br>PIP4K2B - CCDC49 - RPL23<br>SNORA21 - LASP1        | Myeloid/lymphoid or mixed-lineage leukemia (trithorax homolog, Drosophila); translocated to, 6<br>Polycomb group ring finger 2 - Proteasome (prosome, macropain) subunit, beta type, 3<br>Phosphatidylinositol-5-phosphate 4-kinase, type II, alpha - Coiled-coil domain containing 49 - Ribosomal protein L23<br>Small nucleolar RNA, H/ACA box 21 - LIM and SH3 protein 1                                                                                                                                                     | 5                      | 2                      |
| 17q12 e         | 34987922                              | 35394585                            | STARD3<br>TCAP - PNMT - PERLD1 -<br>ERBB2<br>GRB7 - IKZF3 - GSDMB            | Metastatic lymph node protein 64/StAR-related lipid transfer (START) domain containing 3<br>Titin-cap (telethonin) - Phenylethanolamine N-methyltransferase - Per1-like domain containing 1<br>Growth factor receptor-bound protein 7 - IKAROS family zinc finger 3 (Aiolos) - Gasdermin B                                                                                                                                                                                                                                      | 17                     | 4                      |
| 17q21.1-q21.2   | 35467801                              | 35669669                            | NR1D1 - MSL-1<br>CAC3S<br>RAPGEFL1 - WIPF2                                   | Nuclear receptor subfamily 1, group D, member 1 - Male-specific lethal-1 homolog<br>Cancer susceptibility candidate 3/Metastatic lymph node protein 51<br>Rap guanine nucleotide exchange factor (GEF)-like 1 - WAS/WASL interacting protein family, member 2                                                                                                                                                                                                                                                                   | 8                      | 2                      |
| 17q21.31        | 37446175                              | 39040025                            | STAT5B/5A/3 - HSD17B<br>TUBG1 - WNK4 - BECN1<br>AOC3 - BRCA1<br>NBR1         | Signal transducer and activator of transcription 5B/5A/3 - Hydroxysteroid (17-beta) dehydrogenase 1<br>Tubulin, gamma 1 - WNK lysine deficient protein kinase 4 - Beclin 1<br>Autophagy related amine oxidase, copper containing 3 (vascular adhesion protein 1)<br>Neighbour of BRCA1 gene 1/ovarian carcinoma antigen CA125                                                                                                                                                                                                   | 8                      | 2                      |
| 17q21.33        | 44940639                              | 45156078                            | NGFR - NXPH3 - SPOP                                                          | Nerve growth factor receptor (TNFR superfamily, member 16) - Neurexophilin 3 - Speckle-type POZ protein-like                                                                                                                                                                                                                                                                                                                                                                                                                    | 8                      | 4                      |
| 17q22           | 53670992                              | 538454449                           | LPO-MPO-BZRAP1-RNF43                                                         | lactoperoxidase - myeloperoxidase - benzodiazepine receptor (peripheral) associated protein 1 - ring finger protein 43                                                                                                                                                                                                                                                                                                                                                                                                          | 6                      | 3                      |
| 17q23.2-q23.3   | 58263128                              | 58922997                            | MIRN633-TANC2                                                                | tetratricopeptide repeat, ankyrin repeat and coiled-coil containing 2                                                                                                                                                                                                                                                                                                                                                                                                                                                           | 6                      | 4                      |

Supplementary table 3: description of the amplicons

| chromosome band | genomic start position <sup>(b)</sup> | genomic end position <sup>(b)</sup> | genes                                                                        | Description of genes                                                                                                                                                                                                                                                                                                                                                                 | total number of tumors | number of G2I-3 tumors |
|-----------------|---------------------------------------|-------------------------------------|------------------------------------------------------------------------------|--------------------------------------------------------------------------------------------------------------------------------------------------------------------------------------------------------------------------------------------------------------------------------------------------------------------------------------------------------------------------------------|------------------------|------------------------|
| 17q23.3         | 59113749                              | 59554357                            | MAP3K3 - LYK5 - CCDC47<br>DDX42<br>SMACD2<br>CSH1/2<br>GH1-ICAM2             | Mitogen-activated protein kinase kinase kinase 3 - Protein kinase LYK5 - Coiled-coil domain containing 47<br>DEAD (Asp-Glu-Ala-Asp) box polypeptide 42<br>SWI/SNF related, matrix associated, actin dependent regulator of chromatin, subfamily d, member 2<br>Chorionic somatomammotropin hormone 1 (placental lactogen) /2 - Growth hormone 1<br>Intercellular adhesion molecule 2 | 6                      | 3                      |
| 17q24.1         | 60379640                              | 61265765                            | GNA13 - RGS9 - AXIN2<br>CCDC46                                               | Guanine nucleotide binding protein (G protein), alpha 13 - Regulator of G-protein signaling 9 - Axin 2 (conductin, axil)<br>Coiled-coil domain containing 46                                                                                                                                                                                                                         | 2                      | 1                      |
| 17q24.2         | 63118104                              | 63295003                            | PITPNC1<br>NOL1 - BTPF                                                       | Phosphatidylinositol transfer protein, cytoplasmic 1<br>Nucleolar protein 1, 120kDa/Proliferating-cell nucleolar antigen p120 - Bromodomain PHD finger transcription factor                                                                                                                                                                                                          | 4                      | 2                      |
| 17q25.1         | 70781219                              | 71445677                            | GRB2 - LLLGL2 - RECQL5<br>SAP30BP - ITGB4 - GALK1 -<br>H3F3B<br>UNK - WBP2   | Growth factor receptor-bound protein 2 - Lethal giant larvae homolog 2 (Drosophila) - RecQ protein-like 5<br>SAP30 binding protein -Integrin, beta 4 - Galactokinase 1 - H3 histone, family 3B<br>Unkempt homolog (Drosophila) - WW domain binding protein 2                                                                                                                         | 3                      | 2                      |
| 18p11.31        | 3607103                               | 4613737                             | DLGAP1 - GAPDHL11                                                            | Discs, large (Drosophila) homolog-associated protein 1 - Glyceraldehyde-3-phosphate dehydrogenase-like 11                                                                                                                                                                                                                                                                            | 1                      | 1                      |
| 18p11.23        | 8256377                               | 8468885                             | PTRM                                                                         | Protein tyrosine phosphatase, receptor type, M                                                                                                                                                                                                                                                                                                                                       | 1                      | 1                      |
| 18p11.21        | 12818154                              | 13803216                            | PTPN2 - SEH1L - CEP192                                                       | Protein tyrosine phosphatase, non-receptor type 2 - SEH1-like (S. cerevisiae) - Centrosomal protein 192kDa                                                                                                                                                                                                                                                                           | 1                      | 1                      |
| 18p11.21-q22.1  | 58880584                              | 64298616                            | BCL2- VPS4B<br>SERPINB4/5/12/13/3/11/7/8/2/10<br>HSM1<br>CDH7- CDH19<br>DSEL | B-cell CLL/lymphoma 2 - Vacuolar protein sorting 4 homolog B (S. cerevisiae)<br>Serpine peptidase inhibitor, clade B (ovalbumin), member 4/5/12/13/3/11/7/8/2/10<br>Histocompatibility (minor) serpin domain containing - Cadherin 7, type 2 cadherin 19, type 2<br>Dermatan sulfate epimerase-like                                                                                  | 1                      | 1                      |
| 19p13.2         | 11023371                              | 11151169                            | SMARCA4<br>LDLR<br>SPC24                                                     | SWI/SNF related, matrix associated, actin dependent regulator of chromatin, subfamily a, member 4<br>Low density lipoprotein receptor (familial hypercholesterolemia)<br>SPC24, NDC80 kinetochore complex component, homolog (S. cerevisiae)                                                                                                                                         | 4                      | 0                      |
| 19q13.32        | 41164341                              | 41314590                            | ALKBH6 - CLIP3<br>THAP8 - WDR62 - POLR2I<br>TBCB                             | AlkB, alkylation repair homolog 6 (E. coli) - CAP-GLY domain containing linker protein 3<br>THAP domain containing 8 - WD repeat domain 62 - Polymerase (RNA) II (DNA directed) polypeptide I, 14.5kDa<br>Tubulin folding cofactor B                                                                                                                                                 | 1                      | 1                      |
| 19q13.12-q13.31 | 48848178                              | 49021209                            | PLAUR - IRGC<br>KCNN4<br>LYPD5                                               | Plasminogen activator, urokinase receptor - Immunity-related GTPase family, cinema<br>Potassium intermediate/small conductance calcium-activated channel, subfamily N, member 4<br>LY6/PLAUR domain containing 5                                                                                                                                                                     | 1                      | 1                      |
| 20q11.21        | 30031501                              | 30226018                            | XKR7 - HCK<br>TM9SF4                                                         | XK, Kell blood group complex subunit-related family, member 7 - Hemopoietic cell kinase<br>Transmembrane 9 superfamily protein member 4                                                                                                                                                                                                                                              | 6                      | 4                      |
| 20q12           | 40030026                              | 40190025                            | PTPRT                                                                        | Protein tyrosine phosphatase, receptor type, T                                                                                                                                                                                                                                                                                                                                       | 2                      | 2                      |
| 20q13.12a       | 41709495                              | 41887619                            | MYBL2 - GTSF1L                                                               | Target of myb1 (chicken)/TOM1 - Gametocyte specific factor 1-like                                                                                                                                                                                                                                                                                                                    | 3                      | 2                      |
| 20q13.12b       | 45130950                              | 45339408                            | EYA2 - ZMYND8                                                                | Eyes absent homolog 2 (Drosophila) - Zinc finger, MYND-type containing 8                                                                                                                                                                                                                                                                                                             | 4                      | 3                      |
| 20q13.12-q13.13 | 45646762                              | 45864691                            | NCOA3 - SULF2                                                                | Nuclear receptor coactivator 3/Amplified in breast cancer-1 protein - Sulfatase 2                                                                                                                                                                                                                                                                                                    | 4                      | 3                      |
| 20q13.13        | 48173498                              | 48408361                            | CEBPB                                                                        | CCAAT/enhancer binding protein (C/EBP), beta                                                                                                                                                                                                                                                                                                                                         | 3                      | 2                      |
| 20q13.2         | 50383552                              | 52257683                            | TSHZ2 - ZNF217 - BCAS1                                                       | Teashirt zinc finger homeobox 2 - Zinc finger protein 217 - Breast carcinoma amplified sequence 1                                                                                                                                                                                                                                                                                    | 7                      | 3                      |
| 20q13.31-q13.32 | 55139993                              | 55922598                            | BMP7 - SPO11<br>PMEPA1                                                       | Bone morphogenetic protein 7 - SPO11 meiotic protein covalently bound to DSB homolog (S. cerevisiae)<br>Prostate transmembrane protein, androgen induced 1                                                                                                                                                                                                                           | 7                      | 4                      |
| 20q13.32-q13.33 | 59571817                              | 60208710                            | CDH4<br>TAF4                                                                 | Cadherin 4, type 1, R-cadherin (retinal)<br>TAF4 RNA polymerase II, TATA box binding protein (TBP)-associated factor, 135kDa                                                                                                                                                                                                                                                         | 1                      | 1                      |
| 21q21.2-q21.3   | 25400779                              | 26168713                            | MIRN155-MRPL39<br>JAM2 - FOXP2                                               | Mitochondrial ribosomal protein L39<br>Junctional adhesion molecule 2 - Forkhead box P2                                                                                                                                                                                                                                                                                              | 1                      | 0                      |
| 21q22.13-q22.3  | 37360933                              | 45142738                            | various                                                                      |                                                                                                                                                                                                                                                                                                                                                                                      | 1                      | 0                      |
| 22q12.2         | 28266920                              | 28417086                            | THO5 - NIPSNAP1 - NF2                                                        | THO complex 5 - Nipsnap homolog 1(C. elegans) - Neurofibromin 2 (merlin)                                                                                                                                                                                                                                                                                                             | 3                      | 2                      |
| 22q13.32        | 47762144                              | 47962891                            | no known gene                                                                | -                                                                                                                                                                                                                                                                                                                                                                                    | 2                      | 2                      |
| Xp22.2          | 15198599                              | 15677747                            | ASB9/11 - PIGA<br>FIGF - PIR<br>BMX - ACE2                                   | Ankyrin repeat and SOCS box-containing 9/11 - Phosphatidylinositol glycan anchor biosynthesis, class A<br>c-fos induced growth factor (vascular endothelial growth factor D) - Pirin (iron-binding nuclear protein)<br>BMX non-receptor tyrosine kinase - Angiotensin I converting enzyme (peptidyl-dipeptidase A) 2                                                                 | 1                      | 1                      |
| Xq22.3-q27.3    | 107156265                             | 145782456                           | various                                                                      |                                                                                                                                                                                                                                                                                                                                                                                      | 1                      | 1                      |

(a) genomic start or end position on the March 2006 human reference sequence (NCBI Build 36.1 / Hg18)

Supplementary table 4: recurrently lost and gained genomic regions in G2I-3 tumours

| <i>chromosomal band</i> | <i>start</i> | <i>end</i> | <i>GNL status</i> | <i>% L or G</i> | <i>s.d.</i> | <i>p-value</i> | <i>genes</i>                                                 |
|-------------------------|--------------|------------|-------------------|-----------------|-------------|----------------|--------------------------------------------------------------|
| 1p31                    | 69433766     | 83736513   | L                 | 0,65            | 0,05        | 1,30802E-06    | multiple                                                     |
| 1p21                    | 96364079     | 106958243  | L                 | 0,65            | 0,03        | 2,50454E-06    | multiple - CDC14A                                            |
| 2p12(1cl)               | 77381801     | 77582691   | L                 | 0,50            |             | 3,48938E-06    |                                                              |
| 2q14.1                  | 115940769    | 117433903  | L                 | 0,48            | 0,04        | 1,73344E-05    | DPP10                                                        |
| 2q14.3                  | 127490577    | 127839679  | L                 | 0,50            | 0,00        | 8,16679E-05    |                                                              |
| 2q21-2q22               | 135635338    | 145268118  | L                 | 0,58            | 0,04        | 4,40923E-06    | LRP1B                                                        |
| 2q23-q24                | 153986952    | 155861786  | L                 | 0,52            | 0,02        | 6,18625E-07    | KCNJ3                                                        |
| 3p24                    | 19033561     | 22313155   | L                 | 0,54            | 0,00        | 5,56944E-05    | RAB5A - ZNF385D                                              |
| 3p12 (1cl)              | 75883399     | 75997474   | L                 | 0,50            |             | 0,000170757    |                                                              |
| 4p15.3-p14              | 17884311     | 36984301   | L                 | 0,61            | 0,07        | 0,000275663    | CENTD1                                                       |
| 4p13                    | 42860555     | 45776198   | L                 | 0,55            | 0,02        | 0,000139081    | GUF1 - GNPDA2                                                |
| 4q22-q25                | 90883958     | 109959159  | L                 | 0,54            | 0,03        | 1,65081E-06    | CENPE - MTTP - SMARCAD1 - BDH2                               |
| 4q28                    | 132462917    | 137761298  | L                 | 0,53            | 0,03        | 6,73275E-07    | PCDH10                                                       |
| 4q31.3-q32              | 155803832    | 169783309  | L                 | 0,56            | 0,04        | 1,04497E-06    | MAP9 - RAPGEF2 - NAF1 - KLHL2                                |
| 5q14(1cl)               | 85444213     | 85587083   | L                 | 0,50            |             | 1,52201E-05    |                                                              |
| 5q21-q22                | 109440971    | 109844086  | L                 | 0,50            | 0,00        | 5,82345E-06    |                                                              |
| 5q23                    | 119844084    | 120486136  | L                 | 0,52            | 0,02        | 0,000761202    |                                                              |
| 6p12(1cl)               | 48122339     | 48296486   | L                 | 0,50            |             | 6,31087E-07    |                                                              |
| 6q11.1-q14              | 62399682     | 83789522   | L                 | 0,59            | 0,07        | 0,00071993     | TTK - MTO1 - COX7A2 - HMGN3 - FAM135A - CD109 - SOD25 - WTAP |
| 6q16                    | 93870393     | 98804093   | L                 | 0,64            | 0,04        | 0,001860349    | KIAA0776 - MANEA                                             |
| 6q21-q22                | 112903193    | 129293585  | L                 | 0,61            | 0,04        | 0,000979954    | ASF1A - ...                                                  |
| 7q21                    | 83717661     | 83923151   | L                 | 0,52            | 0,02        | 6,31087E-07    |                                                              |
| 7q31-q32                | 118436901    | 126006508  | L                 | 0,50            | 0,00        | 1,25637E-05    | ING3                                                         |
| 9p24                    | 2280507      | 8410998    | L                 | 0,59            | 0,02        | 8,45989E-05    | multiple                                                     |
| 9p23-p22                | 10288475     | 14848928   | L                 | 0,72            | 0,10        | 6,9881E-06     | multiple                                                     |
| 9p21                    | 21733188     | 31833258   | L                 | 0,68            | 0,07        | 1,77424E-05    | CDKN2A                                                       |
| 9p11.1                  | 44289153     | 45919960   | L                 | 0,62            | 0,02        | 2,96673E-07    |                                                              |
| 9q12                    | 64136764     | 66762409   | L                 | 0,61            | 0,00        | 9,81087E-06    |                                                              |
| 10q21                   | 53584260     | 67289025   | L                 | 0,58            | 0,03        | 5,4878E-08     | PCDH15                                                       |
| 11p14                   | 22690875     | 29117657   | L                 | 0,51            | 0,01        | 2,02512E-06    | SVIP                                                         |
| 11p12                   | 39034573     | 41333167   | L                 | 0,50            | 0,00        | 1,8033E-07     |                                                              |
| 11q14-q22               | 87924476     | 107886043  | L                 | 0,74            | 0,09        | 5,88923E-05    | CASP - ATM                                                   |
| 12q14-q21               | 61345783     | 70475338   | G                 | 0,52            | 0,02        | 0,000156027    | multiple - WIF1 - MDM2                                       |
| 13q21                   | 59407380     | 71304898   | L                 | 0,70            | 0,02        | 0,000426044    | multiple                                                     |
| 13q31                   | 78745923     | 93116597   | L                 | 0,66            | 0,04        | 9,42409E-05    | multiple                                                     |
| 14q12                   | 27635797     | 28334953   | L                 | 0,50            | 0,00        | 1,70201E-05    | FOXP1                                                        |
| 14q31-32                | 83206225     | 93819353   | L                 | 0,60            | 0,06        | 8,66485E-05    | ATXN3 - SERPINA1                                             |
| 15q14                   | 33551572     | 36541031   | L                 | 0,60            | 0,02        | 4,48E-06       | ATPBD4                                                       |
| 15q21                   | 44046023     | 52245884   | L                 | 0,57            | 0,02        | 4,50165E-06    | MYO5A                                                        |
| 15q26 (1cl)             | 95572059     | 95680324   | L                 | 0,54            |             | 1,07007E-07    |                                                              |
| 16p13.3 (1 cl)          | 2779832      | 2953509    | G                 | 0,68            |             | 0,000671392    | LYRM1 - CLN3                                                 |
| 17q11.2                 | 23823754     | 24040368   | G                 | 0,52            | 0,02        | 0,000165847    | SDF2                                                         |
| 17q25 (1 cl)            | 74580696     | 74795375   | G                 | 0,57            |             | 0,000322211    | EIF4A3                                                       |
| 18p11.2                 | 14979979     | 15367712   | L                 | 0,63            | 0,02        | 5,94399E-06    | ANKRD30B                                                     |
| 18q12                   | 23277550     | 38729325   | L                 | 0,58            | 0,06        | 0,000492029    | ZNF397 - INO80C                                              |
| 18q22                   | 61064094     | 68885157   | L                 | 0,68            | 0,04        | 7,59901E-05    | SOCS6                                                        |
| 20p13-p11.2             | 18098727     | 49736686   | G                 | 0,57            | 0,04        | 7,71466E-05    | multiple                                                     |
| 20q11.2-q13.3           | 29653482     | 62160261   | G                 | 0,75            | 0,05        | 1,30752E-05    | multiple                                                     |
| 21q11.2-q21             | 13602308     | 28419968   | L                 | 0,58            | 0,04        | 1,51232E-05    | USP25                                                        |
| Xp22.2                  | 10133499     | 15392707   | L                 | 0,52            | 0,03        | 6,00708E-05    | multiple                                                     |
| Xp22.1                  | 20566912     | 21313933   | L                 | 0,55            | 0,05        | 4,54962E-05    |                                                              |
| Xp21-p11.4              | 31749009     | 38158504   | L                 | 0,53            | 0,01        | 0,000104597    | multiple                                                     |
| Xq21                    | 79544292     | 97276033   | L                 | 0,51            | 0,01        | 1,30823E-05    | multiple                                                     |
| Xq25                    | 120579120    | 126778500  | L                 | 0,56            | 0,03        | 2,20257E-06    | XIAP                                                         |
| Xq27                    | 141740494    | 145782456  | L                 | 0,50            | 0,00        | 8,16679E-05    | SLITRK4 SPANX1 - SLITRK2                                     |





Supplementary table 5: list of probe sets defining the transcricomic signature of the G2l-3 tumours and mapping on array-CGH BAC clones

|              |              |    |        |           |           |    |         |       |                |           |           |       |      |      |      |      |
|--------------|--------------|----|--------|-----------|-----------|----|---------|-------|----------------|-----------|-----------|-------|------|------|------|------|
| 218992_at    | C9orf46      | 9  | p24.1  | 5347972   | 5427860   | a  | 4,3E-03 | 0,55  | FE0BPADA4ZG06  | 5009594   | 5181448   | OUT.s | 0,16 | 0,16 | 0,07 | 0,64 |
| 226844_at    | MOBK12B      | 9  | p21.2  | 27315785  | 27316900  | a  | 9,3E-05 | 0,93  | FE0DBACA27ZD11 | 27163232  | 27323328  | IN.se | 0,03 | 0,31 | 0,07 | 0,64 |
| 219343_at    | CDC37L1      | 9  | p24.1  | 4669668   | 4696501   | a  | 2,2E-03 | 0,55  | FE0DBACASZB10  | 3277783   | 3446865   | OUT.s | 0,16 | 0,19 | 0,08 | 0,77 |
| 205818_at    | DBC1         | 9  | q33.1  | 120968728 | 121171522 | a  | 4,3E-03 | 0,32  | FE0DBACA3ZF08  | 121159848 | 121310135 | IN.s  | 0,06 | 0,13 | 0,00 | 0,21 |
| 204457_s_at  | GAS1         | 9  | q21.33 | 88749097  | 88751924  | a  | 1,9E-03 | 0,77  | FE0DBACA12ZH02 | 88305358  | 88478980  | OUT.s | 0,06 | 0,13 | 0,00 | 0,29 |
| 213083_at    | SLC35D2      | 9  | q22.32 | 98122808  | 98185775  | a  | 2,8E-05 | 0,47  | FE0ADELA8ZA12  | 97484626  | 974858608 | OUT.s | 0,13 | 0,09 | 0,07 | 0,21 |
| 240275_at    | ARMC3        | 10 | p12.2  | 23361824  | 23366517  | a  | 1,5E-03 | 0,30  | FE0DBACASZH09  | 23263838  | 23454971  | IN.se | 0,06 | 0,06 | 0,21 | 0,14 |
| 202565_s_at  | SVIL         | 10 | p11.23 | 29786282  | 30064736  | a  | 1,9E-03 | 0,74  | FE0DBACA20ZB10 | 29585210  | 29749487  | OUT.s | 0,00 | 0,00 | 0,50 | 0,00 |
| 221824_s_at  | MARCH8       | 10 | q11.21 | 45270039  | 45272252  | a  | 2,1E-03 | 0,94  | FE0DBACA11ZB04 | 44800643  | 44988426  | OUT.s | 0,03 | 0,09 | 0,07 | 0,29 |
| 232846_s_at  | CDH23        | 10 | q22.1  | 73120233  | 73137268  | a  | 8,6E-04 | 0,25  | FE0DBACA20ZE11 | 73028181  | 73138672  | IN.se | 0,00 | 0,09 | 0,07 | 0,29 |
| 204490_s_at  | CD44         | 11 | p13    | 35117311  | 35207597  | a  | 2,0E-03 | 0,90  | FE0DBACA10ZD02 | 33914327  | 34095862  | OUT.s | 0,16 | 0,06 | 0,14 | 0,07 |
| 212014_x_at  | CD44         | 11 | p13    | 35117303  | 35208819  | a  | 2,8E-03 | 0,98  | FE0DBACA10ZD02 | 33914327  | 34095862  | OUT.s | 0,16 | 0,06 | 0,14 | 0,07 |
| 232947_at    | DKK3         | 11 | p15.3  | 11949170  | 11951776  | a  | 2,5E-04 | 0,18  | FE0BPADA6ZF03  | 11757785  | 11956710  | IN.se | 0,09 | 0,19 | 0,14 | 0,21 |
| 230214_at    | MRV11        | 11 | p15.4  | 10553882  | 10554448  | a  | 4,8E-03 | 0,69  | FE0APADA1ZD05  | 10526853  | 10691597  | IN.se | 0,06 | 0,19 | 0,07 | 0,07 |
| 206528_at    | TRPC6        | 11 | q22.1  | 100828632 | 100959461 | a  | 3,2E-04 | 0,25  | FE0BPADAZ0A8   | 99932478  | 100132546 | OUT.s | 0,00 | 0,00 | 0,00 | 0,50 |
| 207723_s_at  | KLRC3        | 12 | p13.2  | 10456179  | 10464461  | a  | 3,3E-04 | 0,40  | FE0DBACA9ZF01  | 9623735   | 9799377   | OUT.s | 0,09 | 0,06 | 0,36 | 0,29 |
| 202177_at    | GAS6         | 13 | q34    | 113546912 | 113590396 | a  | 9,6E-04 | 0,66  | FE0DBACA10ZF04 | 112314989 | 112494932 | OUT.s | 0,03 | 0,34 | 0,14 | 0,29 |
| 1598_g_at    | GAS6         | 13 | q34    | 113546912 | 113590396 | a  | 2,9E-03 | 0,45  | FE0DBACA10ZF04 | 112314989 | 112494932 | OUT.s | 0,03 | 0,34 | 0,14 | 0,29 |
| 205880_at    | PRKD1        | 14 | q12    | 29115439  | 29466678  | a  | 2,6E-03 | 0,52  | FE0DBACA8ZF03  | 29232717  | 29398694  | IN.se | 0,09 | 0,06 | 0,21 | 0,36 |
| 202255_s_at  | SIPA1L1      | 14 | q24.2  | 71065794  | 7125871   | a  | 4,4E-03 | 0,33  | FE0ADELA7ZH04  | 71015652  | 71147599  | IN.e  | 0,06 | 0,23 | 0,14 | 0,07 |
| 239582_at    | PML          | 15 | q24.1  | 72126749  | 72127125  | a  | 3,8E-04 | 0,32  | FE0ADELA10ZB10 | 71930953  | 72092985  | OUT.s | 0,03 | 0,09 | 0,21 | 0,14 |
| 219229_at    | SLCO3A1      | 15 | q26.1  | 90197949  | 90507783  | a  | 3,3E-04 | 0,68  | FE0DBACA2ZD03  | 89800041  | 89955265  | OUT.s | 0,13 | 0,09 | 0,29 | 0,14 |
| 227048_at    | LAMA1        | 18 | p11.31 | 6931743   | 6940970   | a  | 3,1E-05 | 0,69  | FE0DBACA2ZE12  | 6626632   | 6760758   | OUT.s | 0,09 | 0,16 | 0,14 | 0,71 |
| 225016_at    | APCDD1       | 18 | p11.22 | 10444647  | 10478698  | a  | 8,9E-04 | 1,06  | FE0DBACA13ZC05 | 9999836   | 10178681  | OUT.s | 0,09 | 0,16 | 0,21 | 0,36 |
| 222869_s_at  | ELAC1        | 18 | q21.2  | 46748383  | 46768487  | a  | 2,9E-04 | 0,55  | FE0ADELA8ZC04  | 46732724  | 46887984  | IN.se | 0,03 | 0,29 | 0,07 | 0,50 |
| 203240_at    | FCGBP        | 19 | q13.2  | 45045810  | 45132373  | a  | 1,9E-05 | 1,15  | FE0DBACA7ZC05  | 43987923  | 44207444  | OUT.s | 0,03 | 0,00 | 0,29 | 0,29 |
| 209726_at    | CA11         | 19 | q13.33 | 53833083  | 53841069  | a  | 8,6E-04 | 0,87  | FE0DBACA1ZF02  | 52549610  | 52717102  | OUT.s | 0,09 | 0,03 | 0,36 | 0,00 |
| 219011_at    | PLEKHA4      | 19 | q13.33 | 54032166  | 54063670  | a  | 2,5E-03 | 0,47  | FE0DBACA1ZF02  | 52549610  | 52717102  | OUT.s | 0,09 | 0,03 | 0,36 | 0,00 |
| 235182_at    | C20orf82     | 20 | p12.1  | 13228345  | 13292998  | a  | 6,8E-04 | 1,12  | FE0BPADA6ZC01  | 12584077  | 12761267  | OUT.s | 0,31 | 0,03 | 0,71 | 0,07 |
| 1568742_at   | NA           | 20 | q13.33 | 58333293  | 58334599  | NA | 2,2E-05 | 0,32  | FE0DBACA7ZA04  | 57746390  | 57934405  | OUT.s | 0,31 | 0,00 | 0,50 | 0,21 |
| 54051_at     | PKNOX1       | 21 | q22.3  | 43325413  | 43327023  | a  | 1,5E-03 | 0,15  | FE0BPADA6ZC08  | 43237444  | 43423508  | IN.se | 0,09 | 0,03 | 0,07 | 0,21 |
| 227051_at    | NA           | 21 | q22.3  | 41572895  | 41576325  | NA | 5,5E-04 | 1,23  | FE0DBACA16ZG10 | 41111032  | 41272665  | OUT.s | 0,06 | 0,13 | 0,07 | 0,21 |
| 222062_at    | IL27RA       | NA | NA     | NA        | NA        | a  | 2,1E-03 | 1,00  | NA             | NA        | NA        | NA    | NA   | NA   | NA   | NA   |
| 204061_at    | PRKX         | X  | p22.33 | 3532412   | 3641649   | a  | 3,9E-03 | 0,87  | FE0ADELA8ZD06  | 3114773   | 3306982   | OUT.s | 0,31 | 0,03 | 0,29 | 0,43 |
| 218332_at    | BEX1         | X  | q22.1  | 102204236 | 102205737 | a  | 1,6E-04 | 1,95  | FE0DBACA22ZC10 | 101868569 | 102092519 | OUT.s | 0,09 | 0,09 | 0,07 | 0,29 |
| 228742_at    | NA           | Y  | p11.31 | 2494069   | 2494660   | NA | 3,8E-03 | 0,47  | NA             | NA        | NA        | NA    | NA   | NA   | NA   | NA   |
| 1566965_at   | DPYD         | 1  | p21.3  | 97367213  | 97367926  | b  | 3,0E-03 | -0,14 | FE0DBACA14ZF01 | 96524039  | 96670384  | OUT.s | 0,06 | 0,22 | 0,14 | 0,57 |
| 1561892_at   | ZMYM6        | 1  | p34.3  | 35244219  | 35245780  | b  | 5,4E-04 | -0,18 | FE0ADELA3ZD03  | 34840968  | 34967050  | OUT.s | 0,00 | 0,16 | 0,14 | 0,36 |
| 202017_at    | EPHX1        | 1  | q42.12 | 224079598 | 224099884 | b  | 3,4E-04 | -0,95 | FE0DBACA1ZD11  | 223414280 | 223593296 | OUT.s | 0,47 | 0,00 | 0,71 | 0,00 |
| 1561411_at   | NA           | 1  | q31.3  | 197241793 | 197256789 | NA | 1,0E-03 | -0,20 | FE0DBACA15ZH05 | 196801681 | 196953076 | OUT.s | 0,47 | 0,00 | 0,64 | 0,00 |
| 215328_at    | EFR3B        | 2  | p23.3  | 25118502  | 25224261  | b  | 4,7E-03 | -0,16 | FE0DBACA17ZD11 | 24912656  | 25171590  | IN.e  | 0,06 | 0,09 | 0,07 | 0,07 |
| 1553188_s_at | PARD3B       | 2  | q33.2  | 205118760 | 206188782 | b  | 2,6E-03 | -0,19 | FE0DBACA9ZA06  | 206169966 | 206382976 | IN.s  | 0,03 | 0,09 | 0,00 | 0,29 |
| 225709_at    | ARL6IP6      | 2  | q23.3  | 153282673 | 153326013 | b  | 4,9E-03 | -0,21 | FE0DBACA8ZC12  | 151982665 | 152174394 | OUT.s | 0,19 | 0,09 | 0,07 | 0,36 |
| 239192_at    | PARD3B       | 2  | q33.2  | 205118760 | 205538190 | b  | 3,0E-03 | -0,12 | FE0DBACA18ZE04 | 204940027 | 204966390 | OUT.s | 0,03 | 0,09 | 0,00 | 0,29 |
| 207398_at    | HOXD13       | 2  | q31.1  | 176665777 | 176667732 | b  | 7,1E-04 | -0,25 | FE0BPADA6ZE12  | 176341416 | 176532053 | OUT.s | 0,09 | 0,09 | 0,00 | 0,21 |
| 240483_at    | ZNF713       | 3  | p12.3  | 75872973  | 75873578  | b  | 5,3E-04 | -0,23 | FE0ADELA4ZF07  | 74333644  | 74492463  | OUT.s | 0,04 | 0,29 | 0,10 | 0,40 |
| 221133_s_at  | CLDN18       | 3  | q22.3  | 139211748 | 139232694 | b  | 2,4E-03 | -0,15 | FE0ADELA4ZE08  | 138893610 | 139047468 | OUT.s | 0,00 | 0,00 | 0,00 | 0,00 |
| 207396_s_at  | ALG3         | 3  | q27.1  | 185442906 | 185449453 | b  | 3,6E-03 | -0,40 | FE0DBACA17ZF04 | 184871891 | 185039510 | OUT.s | 0,22 | 0,00 | 0,29 | 0,07 |
| 232756_at    | KALRN        | 3  | q21.2  | 125642981 | 125646172 | b  | 4,1E-03 | -0,16 | FE0BPADA8ZD05  | 125400950 | 125564390 | OUT.s | 0,09 | 0,13 | 0,29 | 0,00 |
| 204743_at    | TAGLN3       | 3  | q13.2  | 113200912 | 113215420 | b  | 1,3E-03 | -0,26 | FE0DBACA17ZB03 | 112433580 | 112599755 | OUT.s | 0,16 | 0,09 | 0,00 | 0,36 |
| 230725_at    | NA           | 5  | q15    | 94063384  | 94076381  | NA | 6,6E-04 | -0,17 | FE0DBACA19ZA05 | 93979406  | 94091427  | IN.se | 0,20 | 0,17 | 0,33 | 0,33 |
| 232035_at    | HIST1H4H     | 6  | p22.1  | 26389332  | 26393741  | b  | 4,5E-03 | -1,48 | FE0DBACA28ZB05 | 26134514  | 26284914  | OUT.s | 0,00 | 0,00 | 0,00 | 0,00 |
| 214516_at    | HIST1H4B     | 6  | p22.1  | 26135012  | 26135484  | b  | 9,2E-04 | -0,19 | FE0DBACA28ZA05 | 26033294  | 26183414  | IN.se | 0,13 | 0,03 | 0,29 | 0,07 |
| 208496_x_at  | HIST1H3G     | 6  | p22.1  | 26379180  | 26379591  | b  | 3,9E-03 | -0,46 | FE0DBACA28ZB05 | 26134514  | 26284914  | OUT.s | 0,00 | 0,00 | 0,00 | 0,00 |
| 1563511_at   | DKFZp451B082 | 6  | q26    | 163679363 | 163688055 | b  | 1,1E-03 | -0,16 | FE0APADA1ZC05  | 163146613 | 163343895 | OUT.s | 0,03 | 0,25 | 0,00 | 0,71 |
| 223998_at    | TLL2         | 6  | q27    | 167658595 | 167675323 | b  | 4,8E-04 | -0,14 | FE0DBACA19ZA09 | 167030525 | 167160672 | OUT.s | 0,00 | 0,00 | 0,00 | 0,00 |
| 203694_s_at  | DHX16        | 6  | NA     | 2069456   | 2089337   | b  | 4,3E-03 | -0,28 | FE0BPADA5ZH02  | 1942880   | 2096921   | IN.se | 0,06 | 0,09 | 0,21 | 0,21 |
| 236510_at    | NA           | 6  | NA     | 1726080   | 1726738   | NA | 1,1E-03 | -0,29 | FE0BPADA8ZC08  | 1381097   | 1568749   | OUT.s | 0,06 | 0,09 | 0,21 | 0,29 |
| 236967_at    | NA           | 7  | q36.3  | 156496360 | 156501881 | NA | 4,4E-03 | -0,84 | FE0DBACA5ZC06  | 156032397 | 156182661 | OUT.s | 0,22 | 0,00 | 0,29 | 0,29 |
| 1569361_a_at | NBR2         | 8  | q11.23 | 55540707  | 55542541  | b  | 9,3E-04 | -0,15 | FE0ADELA15ZC04 | 54844920  | 55029042  | OUT.s | 0,38 | 0,09 | 0,57 | 0,07 |
| 227774_s_at  | IMPAD1       | 8  | q12.1  | 58041355  | 58068542  | b  | 4,6E-03 | -0,22 | FE0BPADA1ZE05  | 57073697  | 57235953  | OUT.s | 0,38 | 0,06 | 0,57 | 0,07 |
| 1557885_at   | C9orf41      | 9  | q21.13 | 76757703  | 76802097  | b  | 2,6E-04 | -0,15 | FE0DBACA12ZG03 | 76025411  | 76195645  | OUT.s | 0,03 | 0,10 | 0,00 | 0,36 |
| 220902_at    | FLJ12616     | 10 | q26.13 | 125752559 | 125754480 | b  | 1,3E-03 | -0,25 | FE0DBACA20ZG12 | 125384674 | 125476488 | OUT.s | 0,00 | 0,16 | 0,21 | 0,29 |
| 224411_at    | PLAZG12B     | 10 | q22.1  | 74365345  | 74384486  | b  | 4,0E-03 | -0,13 | FE0BPADA11ZG09 | 74242499  | 74396459  | IN.se | 0,03 | 0,09 | 0,14 | 0,29 |
| 1558262_at   | SPY2D1       | 11 | p15.1  | 18581087  | 18582006  | b  | 1,9E-03 | -0,12 | FE0ADELA7ZH12  | 18398009  | 18551519  | OUT.s | 0,00 | 0,00 | 0,00 | 0,00 |
| 220303_at    | PDZD3        | 11 | q23.3  | 118561393 | 118565863 | b  | 1,3E-04 | -0,25 | FE0ADELA15ZC09 | 117764287 | 117952972 | OUT.s | 0,03 | 0,44 | 0,00 | 0,64 |
| 231625_at    | SLC22A9      | 11 | q12.3  | 62897784  | 62930674  | b  | 3,0E-03 | -0,19 | FE0DBACA10ZD07 | 62459050  | 62622184  | OUT.s | 0,06 | 0,13 | 0,00 | 0,21 |
| 1552526_at   | FAM71C       | 12 | q23.1  | 98565661  | 98567955  | b  | 1,7E-03 | -0,22 | FE0ADELA12H11  | 98274728  | 98406085  | OUT.s | 0,09 | 0,06 | 0,36 | 0,14 |

Supplementary table 5: list of probe sets defining the transcryptomic signature of the G2I-3 tumours and mapping on array-CGH BAC clones

|              |           |    |        |           |           |                                                                                                                                                                                                                                                                                                                                                                                                                                                                                                                                                                                                                               |   |         |       |                |           |           |       |      |      |      |      |
|--------------|-----------|----|--------|-----------|-----------|-------------------------------------------------------------------------------------------------------------------------------------------------------------------------------------------------------------------------------------------------------------------------------------------------------------------------------------------------------------------------------------------------------------------------------------------------------------------------------------------------------------------------------------------------------------------------------------------------------------------------------|---|---------|-------|----------------|-----------|-----------|-------|------|------|------|------|
| 1560573_at   | LOC387895 | 12 | q24.32 | 125781199 | 125822908 |                                                                                                                                                                                                                                                                                                                                                                                                                                                                                                                                                                                                                               | b | 4,2E-03 | -0,16 | FE0DBACA10ZD03 | 125229752 | 125398297 | OUT.s | 0,06 | 0,09 | 0,21 | 0,07 |
| 217603_at    | ATP6V0A2  | 12 | q24.31 | 122804389 | 122805284 | Cholera - Infection // Epithelial cell signaling in Helicobacter pylori                                                                                                                                                                                                                                                                                                                                                                                                                                                                                                                                                       | b | 3,4E-03 | -0,20 | FE0DBACA15ZG02 | 122467061 | 122617425 | OUT.s | 0,06 | 0,06 | 0,29 | 0,07 |
| 1562722_at   | NBR2      | 13 | q21.1  | 56639331  | 56642353  | infection // Oxidative phosphorylation                                                                                                                                                                                                                                                                                                                                                                                                                                                                                                                                                                                        | b | 1,5E-03 | -0,19 | FE0DBACA21ZG08 | 56555820  | 56758789  | IN.se | 0,03 | 0,34 | 0,07 | 0,50 |
| 215041_s_at  | DOCK9     | 13 | q32.3  | 98338766  | 98336648  |                                                                                                                                                                                                                                                                                                                                                                                                                                                                                                                                                                                                                               | b | 2,6E-03 | -0,24 | FE0BPADA5ZA11  | 97949385  | 98122616  | OUT.s | 0,06 | 0,25 | 0,21 | 0,36 |
| 208034_s_at  | PROZ      | 13 | q34    | 112860968 | 112874695 |                                                                                                                                                                                                                                                                                                                                                                                                                                                                                                                                                                                                                               | b | 9,1E-04 | -0,21 | FE0DBACA10ZF04 | 112314989 | 112494932 | OUT.s | 0,03 | 0,34 | 0,14 | 0,29 |
| 1569699_at   | AK7       | 14 | q32.2  | 95928230  | 95935381  | Purine metabolism                                                                                                                                                                                                                                                                                                                                                                                                                                                                                                                                                                                                             | b | 1,8E-03 | -0,23 | FE0DBACA25ZF01 | 95222988  | 95384707  | OUT.s | 0,00 | 0,00 | 0,00 | 0,00 |
| 1570156_s_at | FMN1      | 15 | q13.3  | 30849385  | 30850684  |                                                                                                                                                                                                                                                                                                                                                                                                                                                                                                                                                                                                                               | b | 4,5E-03 | -0,33 | FE0DBACA7ZD012 | 30654184  | 30830821  | OUT.s | 0,00 | 0,28 | 0,07 | 0,43 |
|              |           |    |        |           |           | Aminoacyl-tRNA biosynthesis // Glutamate metabolism // Porphyrin and chlorophyll metabolism                                                                                                                                                                                                                                                                                                                                                                                                                                                                                                                                   | b | 1,5E-03 | -0,17 | FE0BPADA8ZF04  | 22201758  | 22344702  | OUT.s | 0,34 | 0,03 | 0,71 | 0,00 |
| 1555437_at   | EARS2     | 16 | p12.1  | 23443843  | 23476166  |                                                                                                                                                                                                                                                                                                                                                                                                                                                                                                                                                                                                                               | b | 7,4E-04 | -0,17 | FE0DBACA22ZB02 | 85825997  | 85913555  | OUT.s | 0,06 | 0,50 | 0,14 | 0,50 |
| 1561092_at   | KLHDC4    | 16 | q24.2  | 85959936  | 86317302  |                                                                                                                                                                                                                                                                                                                                                                                                                                                                                                                                                                                                                               | b | 1,6E-03 | -0,22 | FE0DBACA24ZF11 | 23991558  | 24125208  | OUT.s | 0,09 | 0,16 | 0,29 | 0,00 |
| 229056_at    | TP53I13   | 17 | q11.2  | 24918604  | 24922833  |                                                                                                                                                                                                                                                                                                                                                                                                                                                                                                                                                                                                                               | b | 1,9E-04 | -0,23 | FE0ADELA8ZE08  | 41844639  | 42228602  | IN.se | 0,19 | 0,34 | 0,36 | 0,21 |
| 232987_at    | NBR2      | 17 | q21.32 | 41958894  | 41961406  | Cell Communication // ECM-receptor interaction // Focal adhesion // Small cell lung cancer                                                                                                                                                                                                                                                                                                                                                                                                                                                                                                                                    | b | 4,1E-03 | -0,34 | FE0DBACA23ZF09 | 19307985  | 19450405  | OUT.s | 0,09 | 0,16 | 0,36 | 0,21 |
| 1560078_at   | LAMB3     | 18 | q11.2  | 19523744  | 19695766  |                                                                                                                                                                                                                                                                                                                                                                                                                                                                                                                                                                                                                               | b | 2,2E-03 | -0,19 | FE0ADELA9ZE04  | 59104900  | 59292908  | OUT.s | 0,09 | 0,25 | 0,14 | 0,43 |
| 211362_s_at  | SERPINC1  | 18 | q21.33 | 59406862  | 59415650  |                                                                                                                                                                                                                                                                                                                                                                                                                                                                                                                                                                                                                               | b | 3,6E-05 | -0,28 | FE0DBACA23ZF09 | 59107985  | 19450405  | OUT.s | 0,09 | 0,16 | 0,36 | 0,21 |
| 227881_s_at  | C1orf17   | 18 | q11.2  | 19848853  | 19854250  |                                                                                                                                                                                                                                                                                                                                                                                                                                                                                                                                                                                                                               | b | 2,6E-03 | -0,21 | FE0BPADA4ZH07  | 14304753  | 14949555  | OUT.s | 0,06 | 0,03 | 0,36 | 0,14 |
| 217316_at    | OR7A10    | 19 | p13.12 | 14812759  | 14813689  |                                                                                                                                                                                                                                                                                                                                                                                                                                                                                                                                                                                                                               | b | 5,7E-05 | -0,24 | FE0DBACA7ZA02  | 51898533  | 52062055  | IN.se | 0,03 | 0,03 | 0,31 | 0,15 |
| 224011_at    | SLC1A5    | 19 | q13.32 | 51982911  | 51984136  |                                                                                                                                                                                                                                                                                                                                                                                                                                                                                                                                                                                                                               | b | 3,0E-03 | -0,20 | FE0DBACA22H02  | 57749715  | 57900027  | OUT.s | 0,09 | 0,00 | 0,36 | 0,00 |
| 1554952_s_at | NLRP12    | 19 | q13.41 | 58988808  | 59019460  |                                                                                                                                                                                                                                                                                                                                                                                                                                                                                                                                                                                                                               | b | 1,8E-03 | -0,27 | FE0DBACA28ZE02 | 10477896  | 10618405  | IN.se | 0,22 | 0,06 | 0,71 | 0,07 |
| 209097_s_at  | JAG1      | 20 | p12.2  | 10566333  | 10602755  | Notch signaling pathway                                                                                                                                                                                                                                                                                                                                                                                                                                                                                                                                                                                                       | b | 1,6E-03 | -0,82 | FE0DBACA1ZA07  | 15271792  | 15416382  | OUT.s | 0,28 | 0,09 | 0,71 | 0,07 |
| 219570_at    | KIF16B    | 20 | p12.1  | 16200749  | 16302999  | Calcium signaling pathway // Cholera - Infection // Gap junction // GnRH signaling pathway // Long-term depression // Melanogenesis                                                                                                                                                                                                                                                                                                                                                                                                                                                                                           | b | 6,2E-04 | -1,33 | FE0DBACA3ZH10  | 55772261  | 55922598  | OUT.s | 0,39 | 0,00 | 0,57 | 0,14 |
|              |           |    |        |           |           | // Taste transduction                                                                                                                                                                                                                                                                                                                                                                                                                                                                                                                                                                                                         | b | 4,0E-03 | -0,30 | FE0ADELA11ZE12 | 31992437  | 32133000  | OUT.s | 0,25 | 0,03 | 0,64 | 0,14 |
| 214157_at    | GNAS      | 20 | q13.32 | 56850151  | 56909306  |                                                                                                                                                                                                                                                                                                                                                                                                                                                                                                                                                                                                                               | b | 2,8E-03 | -0,42 | FE0ADELA9ZA06  | 35073715  | 35239014  | OUT.s | 0,25 | 0,06 | 0,71 | 0,00 |
| 217917_s_at  | DYNLRB1   | 20 | q11.22 | 32567878  | 32592421  | Glycan structures - biosynthesis 1 // N-Glycan biosynthesis                                                                                                                                                                                                                                                                                                                                                                                                                                                                                                                                                                   | b | 4,4E-04 | -0,22 | FE0DBACA25ZG07 | 43536618  | 43662990  | OUT.s | 0,32 | 0,00 | 0,71 | 0,00 |
| 213491_x_at  | RPN2      | 20 | q11.23 | 35285209  | 35303436  |                                                                                                                                                                                                                                                                                                                                                                                                                                                                                                                                                                                                                               | b | 1,4E-03 | -0,43 | FE0ADELA9ZA06  | 35073715  | 35239014  | OUT.s | 0,25 | 0,06 | 0,71 | 0,00 |
| 1554857_at   | ELMO2     | 20 | q13.12 | 44434881  | 44451176  |                                                                                                                                                                                                                                                                                                                                                                                                                                                                                                                                                                                                                               | b | 1,7E-03 | -0,20 | FE0BPADA11ZE06 | 34169000  | 34346591  | OUT.s | 0,25 | 0,00 | 0,71 | 0,00 |
| 208689_s_at  | RPN2      | 20 | q11.23 | 35241136  | 35303233  | Glycan structures - biosynthesis 1 // N-Glycan biosynthesis                                                                                                                                                                                                                                                                                                                                                                                                                                                                                                                                                                   | b | 1,6E-03 | -0,41 | FE0ADELA9ZA06  | 35073715  | 35239014  | OUT.s | 0,25 | 0,06 | 0,71 | 0,00 |
| 241362_at    | C20orf117 | 20 | q11.23 | 34845355  | 34846091  |                                                                                                                                                                                                                                                                                                                                                                                                                                                                                                                                                                                                                               | b | 1,9E-03 | -0,19 | FE0DBACA6ZG04  | 24369614  | 24533971  | OUT.s | 0,06 | 0,25 | 0,07 | 0,43 |
| 213399_x_at  | RPN2      | 20 | q11.23 | 35294171  | 35303436  | Glycan structures - biosynthesis 1 // N-Glycan biosynthesis                                                                                                                                                                                                                                                                                                                                                                                                                                                                                                                                                                   | b | 7,9E-04 | -0,49 | FE0DBACA23ZC03 | 22867215  | 23061304  | OUT.s | 0,09 | 0,25 | 0,07 | 0,36 |
| 1552652_at   | HPS4      | 22 | q12.1  | 25177445  | 25209820  |                                                                                                                                                                                                                                                                                                                                                                                                                                                                                                                                                                                                                               | b | 1,6E-03 | -0,26 | FE0ADELA13ZF05 | 28374240  | 28545060  | OUT.s | 0,13 | 0,19 | 0,14 | 0,36 |
| 223039_at    | C22orf13  | 22 | q11.23 | 23266409  | 23267514  |                                                                                                                                                                                                                                                                                                                                                                                                                                                                                                                                                                                                                               | b | 1,6E-03 | -0,26 | FE0BPADA5ZA10  | 97942019  | 98136193  | IN.se | 0,06 | 0,22 | 0,14 | 0,57 |
| 226133_s_at  | TBC1D10A  | 22 | q12.2  | 29017979  | 29052914  | Pantothenate and CoA biosynthesis // Pyrimidine metabolism // beta-Alanine metabolism                                                                                                                                                                                                                                                                                                                                                                                                                                                                                                                                         | a | 1,4E-03 | 0,75  | FE0ADELA7ZC03  | 94503701  | 94707287  | OUT.s | 0,09 | 0,19 | 0,07 | 0,57 |
| 204646_at    | DPYD      | 1  | p21.3  | 97315889  | 98159167  | Complement and coagulation cascades                                                                                                                                                                                                                                                                                                                                                                                                                                                                                                                                                                                           | a | 1,2E-03 | 0,69  | FE0DBACA14ZD02 | 13714504  | 13848606  | IN.se | 0,00 | 0,34 | 0,14 | 0,43 |
| 204363_at    | F3        | 1  | p21.3  | 94767460  | 94779903  |                                                                                                                                                                                                                                                                                                                                                                                                                                                                                                                                                                                                                               | a | 1,6E-03 | 0,99  | FE0DBACA1ZG07  | 112869167 | 113015766 | OUT.s | 0,03 | 0,16 | 0,14 | 0,43 |
| 221898_at    | PDPN      | 1  | p36.21 | 13815522  | 13817039  |                                                                                                                                                                                                                                                                                                                                                                                                                                                                                                                                                                                                                               | a | 1,7E-03 | 0,80  | FE0BPADA6ZD05  | 113282311 | 113471064 | IN.s  | 0,06 | 0,13 | 0,14 | 0,43 |
| 202236_s_at  | SLC16A1   | 1  | p13.2  | 113256972 | 113273465 |                                                                                                                                                                                                                                                                                                                                                                                                                                                                                                                                                                                                                               | a | 2,7E-03 | 0,84  | FE0BPADA6ZD05  | 113282311 | 113471064 | IN.s  | 0,06 | 0,13 | 0,14 | 0,43 |
| 202234_s_at  | SLC16A1   | 1  | p13.2  | 113255991 | 113300317 |                                                                                                                                                                                                                                                                                                                                                                                                                                                                                                                                                                                                                               | a | 2,7E-03 | 0,84  | FE0BPADA6ZD05  | 113282311 | 113471064 | IN.s  | 0,06 | 0,13 | 0,14 | 0,43 |
| 209900_s_at  | SLC16A1   | 1  | p13.2  | 113256375 | 113300328 |                                                                                                                                                                                                                                                                                                                                                                                                                                                                                                                                                                                                                               | a | 2,7E-03 | 0,84  | FE0BPADA6ZD05  | 113282311 | 113471064 | IN.s  | 0,06 | 0,13 | 0,14 | 0,43 |
|              |           |    |        |           |           | Galactose metabolism // Glycan structures - biosynthesis 1 // Glycan structures - biosynthesis 2 // Glycosphingolipid biosynthesis - neolactoseries // Keratan sulfate biosynthesis // N-Glycan biosynthesis                                                                                                                                                                                                                                                                                                                                                                                                                  | a | 2,2E-03 | 0,32  | FE0ADELA1ZG08  | 43832683  | 43969267  | OUT.s | 0,09 | 0,06 | 0,14 | 0,43 |
| 209413_at    | B4GALT2   | 1  | p34.1  | 44217693  | 44229426  |                                                                                                                                                                                                                                                                                                                                                                                                                                                                                                                                                                                                                               | a | 3,9E-04 | 0,54  | FE0BPADA4ZA03  | 66606377  | 66787022  | OUT.s | 0,06 | 0,09 | 0,21 | 0,29 |
| 220769_s_at  | WDR78     | 1  | p31.3  | 67052243  | 67113149  |                                                                                                                                                                                                                                                                                                                                                                                                                                                                                                                                                                                                                               | a | 1,2E-03 | 0,68  | FE0ADELA7ZC03  | 94503701  | 94707287  | OUT.s | 0,09 | 0,19 | 0,07 | 0,57 |
| 228297_at    | CNN3      | 1  | p21.3  | 95135100  | 95135515  |                                                                                                                                                                                                                                                                                                                                                                                                                                                                                                                                                                                                                               | a | 1,9E-03 | 0,44  | FE0ADELA1ZA10  | 35476386  | 35592820  | IN.e  | 0,00 | 0,16 | 0,14 | 0,36 |
| 202049_s_at  | ZMYM4     | 1  | p34.3  | 35507154  | 35660127  |                                                                                                                                                                                                                                                                                                                                                                                                                                                                                                                                                                                                                               | a | 2,4E-03 | 0,44  | FE0ADELA7ZF05  | 42569840  | 42722857  | OUT.s | 0,16 | 0,06 | 0,14 | 0,36 |
| 219905_at    | ERMAP     | 1  | p34.2  | 43081930  | 43083242  |                                                                                                                                                                                                                                                                                                                                                                                                                                                                                                                                                                                                                               | a | 6,7E-04 | 0,72  | FE0ADELA1ZF08  | 41165048  | 41301394  | OUT.s | 0,09 | 0,13 | 0,14 | 0,36 |
| 235122_at    | NA        | 1  | p34.2  | 41474623  | 41476697  | NA                                                                                                                                                                                                                                                                                                                                                                                                                                                                                                                                                                                                                            | a | 2,5E-03 | 0,43  | FE0DBACA15ZF05 | 65395414  | 65593152  | OUT.s | 0,03 | 0,10 | 0,21 | 0,29 |
| 202377_at    | NA        | 1  | p31.3  | 65658925  | 65672077  | NA                                                                                                                                                                                                                                                                                                                                                                                                                                                                                                                                                                                                                            | a | 1,3E-03 | 1,43  | FE0ADELA10ZB11 | 151108642 | 151284417 | OUT.s | 0,41 | 0,03 | 0,64 | 0,00 |
| 204268_at    | S100A2    | 1  | q21.3  | 151800444 | 151804632 | Adipocytokine signaling pathway // Apoptosis // B cell receptor signaling pathway // Chronic myeloid leukemia // Colorectal cancer // Endometrial cancer // ErbB signaling pathway // Fc epsilon RI signaling pathway // Focal adhesion // Glioma // Insulin signaling pathway // Jak-STAT signaling pathway // MAPK signaling pathway // Melanoma // Non-small cell lung cancer // Pancreatic cancer // Prostate cancer // Renal cell carcinoma // Small cell lung cancer // T cell receptor signaling pathway // Tight junction // Toll-like receptor signaling pathway // VEGF signaling pathway // mTOR signaling pathway | a | 2,1E-03 | 0,58  | FE0BPADA10ZB04 | 241049232 | 241213107 | OUT.s | 0,47 | 0,00 | 0,64 | 0,00 |
|              |           |    |        |           |           | Adipocytokine signaling pathway // Apoptosis // B cell receptor signaling pathway // Chronic myeloid leukemia // Colorectal cancer // Endometrial cancer // ErbB signaling pathway // Fc epsilon RI signaling pathway // Focal adhesion // Glioma // Insulin signaling pathway // Jak-STAT signaling pathway // MAPK signaling pathway // Melanoma // Non-small cell lung cancer // Pancreatic cancer // Prostate cancer // Renal cell carcinoma // Small cell lung cancer // T cell receptor signaling pathway // Tight junction // Toll-like receptor signaling pathway // VEGF signaling pathway // mTOR signaling pathway | a | 2,5E-03 | 0,57  | FE0BPADA10ZB04 | 241049232 | 241213107 | OUT.s | 0,47 | 0,00 | 0,64 | 0,00 |
| 212609_s_at  | AKT3      | 1  | q44    | 241729648 | 241733354 | Cell Communication // ECM-receptor interaction // Focal adhesion // Small cell lung cancer                                                                                                                                                                                                                                                                                                                                                                                                                                                                                                                                    | a | 2,2E-03 | 0,81  | FE0DBACA14ZF05 | 207724559 | 207869795 | IN.e  | 0,50 | 0,00 | 0,57 | 0,00 |
|              |           |    |        |           |           | Cell Communication // ECM-receptor interaction // Focal adhesion // Small cell lung cancer                                                                                                                                                                                                                                                                                                                                                                                                                                                                                                                                    | a | 1,2E-03 | -0,16 | FE0ADELA12B11  | 183590388 | 183773372 | OUT.s | 0,69 | 0,00 | 0,57 | 0,07 |
|              |           |    |        |           |           |                                                                                                                                                                                                                                                                                                                                                                                                                                                                                                                                                                                                                               | a | 2,9E-03 | -0,25 | FE0DBACA13ZG12 | 182448584 | 182622218 | OUT.s | 0,47 | 0,00 | 0,64 | 0,00 |
|              |           |    |        |           |           |                                                                                                                                                                                                                                                                                                                                                                                                                                                                                                                                                                                                                               | a | 1,1E-03 | 0,91  | FE0ADELA12C11  | 206464881 | 206594557 | OUT.s | 0,50 | 0,00 | 0,57 | 0,00 |
| 222880_at    | AKT3      | 1  | q44    | 241733820 | 242073095 |                                                                                                                                                                                                                                                                                                                                                                                                                                                                                                                                                                                                                               | a | 1,6E-03 | 0,43  | FE0ADELA12C11  | 206464881 | 206594557 | OUT.s | 0,50 | 0,00 | 0,57 | 0,00 |
| 209270_at    | LAMB3     | 1  | q32.2  | 207854944 | 207892297 |                                                                                                                                                                                                                                                                                                                                                                                                                                                                                                                                                                                                                               | a | 1,6E-03 | 0,43  | FE0ADELA12C11  | 206464881 | 206594557 | OUT.s | 0,50 | 0,00 | 0,57 | 0,00 |
| 208274_at    | OCLM1     | 1  | q31.1  | 184636326 | 184637210 |                                                                                                                                                                                                                                                                                                                                                                                                                                                                                                                                                                                                                               | a | 2,9E-03 | -0,25 | FE0DBACA13ZG12 | 182448584 | 182622218 | OUT.s | 0,47 | 0,00 | 0,64 | 0,00 |
| 237098_at    | C1orf21   | 1  | q25.3  | 182852858 | 182853574 |                                                                                                                                                                                                                                                                                                                                                                                                                                                                                                                                                                                                                               | a | 1,1E-03 | 0,91  | FE0ADELA12C11  | 206464881 | 206594557 | OUT.s | 0,50 | 0,00 | 0,57 | 0,00 |
| 226755_at    | NA        | 1  | q32.2  | 207670653 | 207672517 | NA                                                                                                                                                                                                                                                                                                                                                                                                                                                                                                                                                                                                                            | a | 1,6E-03 | 0,43  | FE0ADELA12C11  | 206464881 | 206594557 | OUT.s | 0,50 | 0,00 | 0,57 | 0,00 |
| 1555942_a_at | NA        | 1  | q32.2  | 207668786 | 207672516 | NA                                                                                                                                                                                                                                                                                                                                                                                                                                                                                                                                                                                                                            | a | 1,6E-03 | 0,43  | FE0ADELA12C11  | 206464881 | 206594557 | OUT.s | 0,50 | 0,00 | 0,57 | 0,00 |

Supplementary table 5: list of probe sets defining the transcritomic signature of the G2I-3 tumours and mapping on array-CGH BAC clones

| Probe ID     | Gene             | Chr | Start (kb) | End (kb)  | Gene      | Strand                                                                          | Log2 FC | Log2 FC | BAC ID | Log2 FC         | BAC ID    | Log2 FC   | Gene  | Strand | Log2 FC | Gene | Strand | Log2 FC |
|--------------|------------------|-----|------------|-----------|-----------|---------------------------------------------------------------------------------|---------|---------|--------|-----------------|-----------|-----------|-------|--------|---------|------|--------|---------|
| 244428_at    | <b>DNMT3A</b>    | 2   | p23.3      | 25357825  | 25358721  | Methionine metabolism                                                           | a       | 2,2E-04 | 0.53   | FE0ADELA4ZG03   | 25347585  | 25544449  | IN.se | 0.06   | 0.09    | 0.07 | 0.07   |         |
| 240130_at    | NA               | 2   | p16.3      | 48640685  | 48641111  | NA                                                                              | b       | 2,4E-03 | -0.13  | FE0ADELA9ZFO4   | 47865648  | 48007408  | OUT.s | 0.09   | 0.06    | 0.00 | 0.07   |         |
| 227449_at    | <b>EPHA4</b>     | 2   | q36.1      | 22199098  | 221991867 | Axon guidance                                                                   | a       | 1,5E-03 | 0.66   | FE0BPADA13ZA01  | 221296967 | 221446303 | OUT.s | 0.09   | 0.13    | 0.00 | 0.21   |         |
| 242828_at    | <b>FIGN</b>      | 2   | q24.3      | 164170631 | 164174446 | NA                                                                              | a       | 1,2E-03 | 0.50   | FE0DBACA18ZF02  | 163626982 | 163795524 | OUT.s | 0.13   | 0.09    | 0.00 | 0.29   |         |
| 221935_s_at  | C3orf64          | 3   | p14.1      | 69107052  | 69109490  | NA                                                                              | a       | 1,5E-03 | 0.91   | FE0BPADA7ZB11   | 68279314  | 68457599  | OUT.s | 0.03   | 0.34    | 0.14 | 0.29   |         |
| 229831_at    | <b>CNTN3</b>     | 3   | p12.3      | 74394411  | 74618331  | NA                                                                              | a       | 1,9E-03 | 1.17   | FE0DBACASZA03   | 74333643  | 74492281  | IN.e  | 0.06   | 0.34    | 0.07 | 0.43   |         |
| 209863_s_at  | <b>TP63</b>      | 3   | q28        | 190990159 | 191097749 | NA                                                                              | a       | 2,7E-03 | 1.25   | FE0APADA2ZB11   | 190906402 | 191068102 | IN.e  | 0.22   | 0.03    | 0.14 | 0.29   |         |
| 211194_s_at  | <b>TP63</b>      | 3   | q28        | 190990225 | 191095984 | NA                                                                              | a       | 2,8E-03 | 0.75   | FE0APADA2ZB11   | 190906402 | 191068102 | IN.e  | 0.22   | 0.03    | 0.14 | 0.29   |         |
| 205227_at    | <b>ILIRAP</b>    | 3   | q28        | 191714584 | 191851995 | Apoptosis // Cytokine-cytokine receptor interaction                             | a       | 6,0E-04 | 0.33   | FE0ADELA4ZC09   | 191651376 | 191835476 | IN.e  | 0.00   | 0.00    | 0.50 | 0.50   |         |
| 218717_s_at  | <b>LEPREL1</b>   | 3   | q28        | 191157315 | 191320803 | NA                                                                              | a       | 6,3E-04 | 0.79   | FE0APADA2ZB11   | 190906402 | 191068102 | OUT.s | 0.22   | 0.03    | 0.14 | 0.29   |         |
| 202555_s_at  | <b>MYLK</b>      | 3   | q21.1      | 124815581 | 124903051 | Calcium signaling pathway // Focal adhesion // Regulation of actin cytoskeleton | a       | 8,8E-04 | 0.85   | FE0DBACA1ZG10   | 123351131 | 123501875 | OUT.s | 0.09   | 0.09    | 0.21 | 0.07   |         |
| 210079_x_at  | <b>KCNAB1</b>    | 3   | q25.31     | 157343594 | 157737497 | NA                                                                              | b       | 8,9E-04 | -0.23  | FE0BPADA11ZA10  | 156874008 | 157024204 | OUT.s | 0.00   | 0.00    | 0.50 | 0.00   |         |
| 224823_at    | <b>MYLK</b>      | 3   | q21.1      | 124813773 | 124815680 | Calcium signaling pathway // Focal adhesion // Regulation of actin cytoskeleton | a       | 2,9E-03 | 0.82   | FE0DBACA1ZG10   | 123351131 | 123501875 | OUT.s | 0.09   | 0.09    | 0.21 | 0.07   |         |
| 220733_at    | <b>SLC26A1</b>   | 4   | p16.3      | 971772    | 977183    | NA                                                                              | b       | 1,8E-03 | -0.24  | FE0ADELA13ZG08  | 55703     | 207193    | OUT.s | 0.00   | 0.09    | 0.07 | 0.36   |         |
| 204924_at    | <b>TLR2</b>      | 4   | q31.3      | 154843487 | 154845980 | Toll-like receptor signaling pathway                                            | a       | 2,4E-03 | 0.58   | FE0BPADA7ZA08   | 154717641 | 154885253 | IN.se | 0.13   | 0.03    | 0.14 | 0.36   |         |
| 221942_s_at  | <b>GUCY1A3</b>   | 4   | q32.1      | 156857818 | 156872180 | Gap junction // Long-term depression // Purine metabolism                       | a       | 9,3E-04 | 0.97   | FE0BPADA12ZC01  | 156675950 | 156846238 | OUT.s | 0.13   | 0.06    | 0.14 | 0.43   |         |
| 227088_at    | <b>PDE5A</b>     | 4   | q27        | 120635001 | 120636706 | Purine metabolism                                                               | a       | 2,1E-03 | 1.05   | FE0APADA2ZH05   | 120171769 | 120330659 | OUT.s | 0.13   | 0.03    | 0.14 | 0.29   |         |
| 1556698_a_at | <b>GPRII3</b>    | 4   | q22.1      | 90384448  | 90391368  | NA                                                                              | a       | 2,2E-03 | 0.31   | FE0DBACA2ZF12   | 89342577  | 89493214  | OUT.s | 0.09   | 0.03    | 0.21 | 0.36   |         |
| 229530_at    | NA               | 4   | q32.1      | 156873364 | 156874431 | NA                                                                              | a       | 3,0E-04 | 0.98   | FE0BPADA12ZC01  | 156675950 | 156846238 | OUT.s | 0.13   | 0.06    | 0.14 | 0.43   |         |
| 205405_at    | <b>SEMA5A</b>    | 5   | p15.2      | 9091858   | 9599158   | Axon guidance                                                                   | a       | 1,6E-04 | 0.72   | FE0DBACA1ZG07   | 9480400   | 9682601   | IN.s  | 0.16   | 0.00    | 0.14 | 0.21   |         |
| 220076_at    | <b>ANKH</b>      | 5   | p15.2      | 14757909  | 14924616  | NA                                                                              | a       | 4,0E-04 | 0.63   | FE0BPADA7ZH03   | 13126726  | 13314258  | OUT.s | 0.19   | 0.03    | 0.14 | 0.29   |         |
| 244650_at    | <b>FAM105A</b>   | 5   | p15.2      | 14664467  | 14665027  | MAPK signaling pathway // Melanoma // Regulation of actin cytoskeleton          | a       | 2,6E-03 | 0.64   | FE0BPADA7ZH03   | 13126726  | 13314258  | OUT.s | 0.19   | 0.03    | 0.14 | 0.29   |         |
| 205117_at    | <b>FGF1</b>      | 5   | q31.3      | 141951926 | 142045820 | cytoskeleton                                                                    | a       | 2,9E-03 | 0.72   | FE0ADELA15ZF01  | 141852242 | 141998311 | IN.e  | 0.19   | 0.13    | 0.21 | 0.07   |         |
| 219932_at    | <b>SLC27A6</b>   | 5   | q23.3      | 128329576 | 128396887 | PPAR signaling pathway                                                          | a       | 4,5E-04 | 0.77   | FE0DBACA19ZA03  | 128378376 | 128611237 | IN.s  | 0.19   | 0.13    | 0.14 | 0.14   |         |
| 226576_at    | <b>ARHGAP26</b>  | 5   | q31.3      | 142587059 | 142588763 | NA                                                                              | a       | 6,2E-04 | 0.89   | FE0DBACA20ZF03  | 142528844 | 142679287 | IN.se | 0.22   | 0.16    | 0.21 | 0.29   |         |
| 244548_at    | <b>ARHGAP26</b>  | 5   | q31.3      | 142306312 | 142306869 | NA                                                                              | a       | 6,8E-04 | 0.30   | FE0DBACA19ZF02  | 141941600 | 142028404 | OUT.s | 0.22   | 0.13    | 0.21 | 0.47   |         |
| 205068_s_at  | <b>ARHGAP26</b>  | 5   | q31.3      | 142130475 | 142586243 | NA                                                                              | a       | 1,7E-03 | 0.67   | FE0DBACA20ZF03  | 142528844 | 142679287 | IN.s  | 0.22   | 0.16    | 0.21 | 0.29   |         |
| 227056_at    | <b>KIAA0141</b>  | 5   | q31.3      | 141293045 | 141295232 | NA                                                                              | a       | 2,9E-03 | 0.40   | FE0DBACA4ZG04   | 141031072 | 141196441 | OUT.s | 0.19   | 0.16    | 0.29 | 0.07   |         |
| 220375_s_at  | NA               | 5   | q31.1      | 134396868 | 134708269 | NA                                                                              | a       | 2,3E-03 | -0.24  | FE0DBACA16ZG06  | 134419761 | 134591443 | OUT.s | 0.19   | 0.19    | 0.29 | 0.07   |         |
| 208569_at    | <b>HIST1H2AB</b> | 6   | p22.1      | 26141382  | 26141775  | NA                                                                              | a       | 6,0E-04 | -0.20  | FE0DBACA28ZA05  | 26033294  | 26183414  | IN.se | 0.13   | 0.03    | 0.29 | 0.07   |         |
| 234682_at    | <b>BTBD9</b>     | 6   | p21.2      | 38668240  | 38673848  | NA                                                                              | a       | 6,0E-04 | -0.17  | FE0BPADA6ZB07   | 38488141  | 38660731  | OUT.s | 0.16   | 0.00    | 0.29 | 0.14   |         |
| 209911_x_at  | <b>HIST1H2BD</b> | 6   | p22.1      | 26266351  | 26279553  | NA                                                                              | a       | 2,5E-03 | -0.99  | FE0DBACA28ZB05  | 26134514  | 26284914  | IN.se | 0.00   | 0.00    | 0.00 | 0.07   |         |
| 203836_s_at  | <b>MAP3K5</b>    | 6   | q23.3      | 136920458 | 137155257 | MAPK signaling pathway                                                          | a       | 2,1E-03 | 0.80   | FE0ADELA13ZG07  | 136892735 | 137046976 | IN.e  | 0.16   | 0.25    | 0.14 | 0.57   |         |
| 237347_at    | <b>KHDC1</b>     | 6   | q13        | 74031348  | 74031979  | NA                                                                              | a       | 1,2E-03 | 0.44   | FE0BPADA4ZF07   | 73016383  | 73157546  | OUT.s | 0.06   | 0.16    | 0.07 | 0.50   |         |
| 1556211_a_at | <b>AIG1</b>      | 6   | q24.2      | 143699221 | 143701999 | NA                                                                              | a       | 1,5E-03 | 0.54   | FE0DBACA3ZE11   | 143362837 | 143512585 | OUT.s | 0.16   | 0.25    | 0.07 | 0.64   |         |
| 229317_at    | <b>KPNA5</b>     | 6   | q22.2      | 117162729 | 117163496 | NA                                                                              | a       | 2,0E-03 | 0.68   | FE0BPADA7ZF09   | 115807782 | 116004630 | OUT.s | 0.09   | 0.28    | 0.00 | 0.71   |         |
| 223886_s_at  | <b>RNF146</b>    | 6   | q22.33     | 127629712 | 127651200 | NA                                                                              | a       | 2,2E-03 | 0.36   | FE0BPADA12ZE08  | 127510880 | 127664223 | IN.se | 0.13   | 0.28    | 0.00 | 0.71   |         |
| 204165_at    | <b>WASF1</b>     | 6   | q21        | 110527714 | 110606609 | Adherens junction // Regulation of actin cytoskeleton                           | a       | 2,5E-03 | 0.81   | FE0DBACA5ZE08   | 109464083 | 109604920 | OUT.s | 0.09   | 0.28    | 0.07 | 0.57   |         |
| 202318_s_at  | <b>SENP6</b>     | 6   | q14.1      | 76368945  | 76482326  | NA                                                                              | a       | 2,8E-03 | 0.43   | FE0ADELA7ZF01   | 76145606  | 76312627  | OUT.s | 0.03   | 0.22    | 0.00 | 0.69   |         |
| 243904_at    | NA               | 6   | q24.3      | 147751269 | 147752298 | NA                                                                              | a       | 5,1E-04 | -0.38  | FE0BPADA6ZH03   | 147132229 | 147329173 | OUT.s | 0.16   | 0.25    | 0.07 | 0.64   |         |
| 243719_at    | <b>STK19</b>     | 6   | NA         | 3393557   | 3394054   | NA                                                                              | b       | 2,1E-03 | 0.20   | FE0DBACASZC08   | 2641344   | 2815440   | OUT.s | 0.06   | 0.09    | 0.21 | 0.21   |         |
| 235229_at    | NA               | 6   | NA         | 777607    | 779212    | NA                                                                              | a       | 1,3E-03 | 1.15   | FE0DBACA24ZC08  | 230896    | 357473    | OUT.s | 0.09   | 0.13    | 0.21 | 0.29   |         |
| 213943_at    | <b>TWIST1</b>    | 7   | p21.1      | 19121615  | 19123809  | NA                                                                              | a       | 1,1E-03 | 0.86   | FE0DBACA19ZC09  | 18859764  | 19033257  | OUT.s | 0.28   | 0.03    | 0.29 | 0.14   |         |
| 229228_at    | <b>CREB5</b>     | 7   | p15.1      | 28831565  | 28832033  | Prostate cancer                                                                 | a       | 1,6E-03 | 0.41   | FE0DBACA2ZE04   | 28660076  | 28724097  | OUT.s | 0.22   | 0.06    | 0.29 | 0.00   |         |
| 239218_at    | <b>NA</b>        | 7   | p15.1      | 31789663  | 31790010  | NA                                                                              | a       | 1,5E-03 | 0.32   | FE0DBACA19ZD010 | 30721972  | 30874417  | OUT.s | 0.22   | 0.00    | 0.29 | 0.00   |         |
| 209993_at    | <b>ABCB1</b>     | 7   | q21.12     | 86971261  | 87068119  | ABC transporters - General                                                      | a       | 3,8E-04 | 0.49   | FE0ADELA15ZF03  | 86539096  | 86700050  | OUT.s | 0.25   | 0.00    | 0.29 | 0.43   |         |
| 209465_x_at  | <b>PTN</b>       | 7   | q33        | 136562627 | 136679118 | NA                                                                              | a       | 1,3E-03 | 1.16   | FE0ADELA9ZA05   | 136491374 | 136652222 | IN.e  | 0.22   | 0.03    | 0.29 | 0.29   |         |
| 228110_x_at  | NA               | 7   | q11.21     | 65842259  | 65843112  | NA                                                                              | a       | 2,3E-03 | -0.50  | FE0BPADA11ZG05  | 65773246  | 65925888  | IN.se | 0.16   | 0.00    | 0.36 | 0.07   |         |
| 200762_at    | <b>DGPSL2</b>    | 8   | p21.2      | 26491372  | 26571607  | Axon guidance                                                                   | a       | 2,3E-03 | 0.78   | FE0DBACA4ZD02   | 26308669  | 26476364  | OUT.s | 0.00   | 0.50    | 0.00 | 1.00   |         |
| 210397_at    | <b>DEFB1</b>     | 8   | p23.1      | 6715568   | 6722860   | NA                                                                              | a       | 2,3E-03 | 0.97   | FE0BPADA5ZF03   | 6182469   | 6364998   | OUT.s | 0.09   | 0.47    | 0.07 | 0.64   |         |
| 238458_at    | <b>EPHA2</b>     | 8   | p22        | 17023322  | 17024516  | NA                                                                              | a       | 4,8E-04 | 0.39   | FE0DBACA13ZC02  | 15547187  | 15733616  | OUT.s | 0.09   | 0.47    | 0.07 | 0.64   |         |
| 222731_at    | <b>ZDHHC2</b>    | 8   | p22        | 17058206  | 17124612  | NA                                                                              | a       | 5,1E-04 | 1.02   | FE0DBACA13ZC02  | 15547187  | 15733616  | OUT.s | 0.09   | 0.47    | 0.07 | 0.64   |         |
| 232302_at    | <b>PDLIM2</b>    | 8   | p21.3      | 22493988  | 22511483  | NA                                                                              | b       | 1,7E-03 | -0.13  | FE0APADA12ZA02  | 22048391  | 22230663  | OUT.s | 0.09   | 0.47    | 0.07 | 0.64   |         |
| 222730_s_at  | <b>ZDHHC2</b>    | 8   | p22        | 17058206  | 17124612  | NA                                                                              | a       | 2,7E-03 | 0.69   | FE0DBACA13ZC02  | 15547187  | 15733616  | OUT.s | 0.09   | 0.47    | 0.07 | 0.64   |         |
| 204076_at    | <b>ENTPD4</b>    | 8   | p21.3      | 23342619  | 23371106  | Purine metabolism // Pyrimidine metabolism                                      | a       | 2,9E-03 | 0.41   | FE0DBACA13ZD02  | 23345195  | 23521961  | IN.s  | 0.09   | 0.50    | 0.07 | 0.64   |         |
| 229568_at    | <b>MOBK12B</b>   | 9   | p21.2      | 27315207  | 27315813  | NA                                                                              | a       | 6,7E-05 | 0.78   | FE0DBACA27ZD11  | 27163322  | 27323328  | IN.se | 0.03   | 0.31    | 0.07 | 0.64   |         |
| 236100_at    | <b>FBXO10</b>    | 9   | p13.2      | 37531238  | 37566250  | NA                                                                              | b       | 7,8E-04 | -0.18  | FE0ADELA10ZA10  | 36895443  | 37054507  | OUT.s | 0.13   | 0.22    | 0.07 | 0.36   |         |
| 226221_at    | <b>KIAA1432</b>  | 9   | p24.1      | 5743207   | 5767038   | NA                                                                              | a       | 1,2E-03 | 0.33   | FE0BPADA4ZG06   | 5009594   | 5181448   | OUT.s | 0.16   | 0.16    | 0.07 | 0.64   |         |
| 237169_at    |                  |     |            |           |           |                                                                                 |         |         |        |                 |           |           |       |        |         |      |        |         |

Supplementary table 5: list of probe sets defining the transcryptomic signature of the G2I-3 tumours and mapping on array-CGH BAC clones

|                                                                                                                                                                                                                                                                                                                                                                                                                                                                                                                                                                                                                   |            |    |        |           |           |                                                                        |   |         |       |                |           |           |       |      |      |      |      |
|-------------------------------------------------------------------------------------------------------------------------------------------------------------------------------------------------------------------------------------------------------------------------------------------------------------------------------------------------------------------------------------------------------------------------------------------------------------------------------------------------------------------------------------------------------------------------------------------------------------------|------------|----|--------|-----------|-----------|------------------------------------------------------------------------|---|---------|-------|----------------|-----------|-----------|-------|------|------|------|------|
| 206785_s_at                                                                                                                                                                                                                                                                                                                                                                                                                                                                                                                                                                                                       | NA         | 12 | p13.2  | 10474474  | 10479897  | NA                                                                     | a | 2,3E-03 | 0,46  | FE0DBACA9ZF01  | 9623735   | 9799377   | OUT.s | 0,09 | 0,06 | 0,36 | 0,29 |
| 213711_at                                                                                                                                                                                                                                                                                                                                                                                                                                                                                                                                                                                                         | KRT81      | 12 | q13.13 | 50965963  | 50971516  | Cell Communication                                                     | a | 2,6E-03 | 0,71  | FE0DBACA142C10 | 50551168  | 50763736  | OUT.s | 0,06 | 0,03 | 0,43 | 0,00 |
| 232505_at                                                                                                                                                                                                                                                                                                                                                                                                                                                                                                                                                                                                         | DCTN2      | 12 | q13.3  | 56217965  | 56220099  |                                                                        | b | 2,7E-03 | -0,18 | FE0ADELA15ZE10 | 56048376  | 56258422  | IN.se | 0,09 | 0,00 | 0,50 | 0,07 |
| 213680_at                                                                                                                                                                                                                                                                                                                                                                                                                                                                                                                                                                                                         | KRT6B      | 12 | q13.13 | 51126701  | 51127546  | Cell Communication                                                     | a | 1,9E-03 | 1,85  | FE0DBACA142C10 | 50551168  | 50763736  | OUT.s | 0,06 | 0,03 | 0,43 | 0,00 |
| 243891_at                                                                                                                                                                                                                                                                                                                                                                                                                                                                                                                                                                                                         | P76        | 12 | q24.13 | 112294001 | 112294528 |                                                                        | b | 2,3E-03 | -0,32 | FE0DBACA21ZH06 | 111640268 | 111790683 | OUT.s | 0,06 | 0,06 | 0,21 | 0,14 |
| 203413_at                                                                                                                                                                                                                                                                                                                                                                                                                                                                                                                                                                                                         | NELL2      | 12 | q12    | 43188331  | 43556405  |                                                                        | a | 2,9E-03 | 1,60  | FE0DBACA142D12 | 42529874  | 42691001  | OUT.s | 0,06 | 0,06 | 0,29 | 0,21 |
| 1559924_at                                                                                                                                                                                                                                                                                                                                                                                                                                                                                                                                                                                                        | NA         | 12 | q13.11 | 45051411  | 45053828  | NA                                                                     | b | 1,0E-03 | -0,15 | FE0DBACA9ZA01  | 44779104  | 44962703  | OUT.s | 0,03 | 0,06 | 0,43 | 0,07 |
| 241470_x_at                                                                                                                                                                                                                                                                                                                                                                                                                                                                                                                                                                                                       | NA         | 12 | q21.31 | 84718611  | 84718906  | NA                                                                     | a | 2,0E-03 | 0,34  | FE0DBACA5ZF10  | 84479444  | 84673896  | OUT.s | 0,13 | 0,06 | 0,36 | 0,36 |
| 226136_at                                                                                                                                                                                                                                                                                                                                                                                                                                                                                                                                                                                                         | NA         | 12 | q21.2  | 74179310  | 74181975  | NA                                                                     | a | 2,0E-03 | 0,57  | FE0DBACA9ZB01  | 73729731  | 73899705  | OUT.s | 0,10 | 0,10 | 0,46 | 0,23 |
| 232054_at                                                                                                                                                                                                                                                                                                                                                                                                                                                                                                                                                                                                         | PCDH20     | 13 | q21.31 | 60881821  | 60887282  |                                                                        | a | 1,2E-03 | 0,60  | FE0DBACA10ZE10 | 60770296  | 60969701  | IN.se | 0,03 | 0,34 | 0,08 | 0,54 |
| 216569_at                                                                                                                                                                                                                                                                                                                                                                                                                                                                                                                                                                                                         | NA         | 13 | q14.11 | 41841349  | 41841793  | NA                                                                     | b | 2,8E-03 | -0,21 | FE0BPADA4ZE03  | 41403116  | 41593081  | OUT.s | 0,00 | 0,34 | 0,00 | 0,43 |
| 240841_at                                                                                                                                                                                                                                                                                                                                                                                                                                                                                                                                                                                                         | INSM2      | 14 | q13.2  | 35075545  | 35076011  |                                                                        | b | 2,0E-03 | -0,22 | FE0DBACA21ZD09 | 33496774  | 33569017  | OUT.s | 0,13 | 0,06 | 0,29 | 0,21 |
| 215971_at                                                                                                                                                                                                                                                                                                                                                                                                                                                                                                                                                                                                         | NA         | 14 | q23.1  | 59634394  | 59635415  | NA                                                                     | b | 1,6E-03 | -0,20 | FE0BPADA11ZD07 | 58786413  | 58957923  | OUT.s | 0,13 | 0,19 | 0,29 | 0,14 |
| 227367_at                                                                                                                                                                                                                                                                                                                                                                                                                                                                                                                                                                                                         | SLCO3A1    | 15 | q26.1  | 90508725  | 90510137  |                                                                        | a | 8,5E-05 | 0,68  | FE0DBACA2ZD03  | 89800041  | 89955265  | OUT.s | 0,13 | 0,09 | 0,29 | 0,14 |
| 238868_at                                                                                                                                                                                                                                                                                                                                                                                                                                                                                                                                                                                                         | UACA       | 15 | q23    | 68733948  | 68734526  |                                                                        | a | 2,8E-03 | 0,43  | FE0BPADA10ZG04 | 67720612  | 67874479  | OUT.s | 0,03 | 0,06 | 0,15 | 0,15 |
| 203828_s_at                                                                                                                                                                                                                                                                                                                                                                                                                                                                                                                                                                                                       | IL32       | 16 | p13.3  | 3055665   | 3059552   |                                                                        | a | 2,0E-03 | 0,77  | FE0DBACA13ZB03 | 2779832   | 2953509   | OUT.s | 0,29 | 0,00 | 0,79 | 0,00 |
| 227256_at                                                                                                                                                                                                                                                                                                                                                                                                                                                                                                                                                                                                         | USP31      | 16 | p12.1  | 22980235  | 22981746  |                                                                        | a | 1,4E-03 | 0,71  | FE0BPADA8ZF04  | 22201758  | 22344702  | OUT.s | 0,34 | 0,03 | 0,71 | 0,00 |
| 228118_x_at                                                                                                                                                                                                                                                                                                                                                                                                                                                                                                                                                                                                       | C16orf13   | 16 | p13.3  | 624430    | 626315    |                                                                        | b | 1,7E-03 | -0,15 | FE0ADELA8ZH07  | 86672     | 202986    | OUT.s | 0,34 | 0,03 | 0,71 | 0,00 |
| 232051_at                                                                                                                                                                                                                                                                                                                                                                                                                                                                                                                                                                                                         | CCDC102A   | 16 | q13    | 56103714  | 56112559  |                                                                        | a | 1,3E-03 | 0,35  | FE0DBACA13ZA04 | 56002623  | 56156729  | IN.se | 0,03 | 0,53 | 0,14 | 0,43 |
| 1566680_at                                                                                                                                                                                                                                                                                                                                                                                                                                                                                                                                                                                                        | PDLIM2     | 16 | q23.1  | 77794020  | 77796340  |                                                                        | b | 1,8E-03 | -0,18 | FE0DBACA5ZC10  | 77599670  | 77781420  | OUT.s | 0,09 | 0,56 | 0,14 | 0,50 |
| 205031_at                                                                                                                                                                                                                                                                                                                                                                                                                                                                                                                                                                                                         | EFNB3      | 17 | p13.1  | 7549428   | 7555370   | Axon guidance                                                          | a | 2,0E-03 | 0,75  | FE0DBACA23ZA02 | 7541951   | 7542427   | OUT.s | 0,00 | 0,47 | 0,15 | 0,69 |
| Calcium signaling pathway // Cholera - Infection // ErbB signaling pathway // Fc epsilon RI signaling pathway // Focal adhesion // Gap junction // Glioma // GnRH signaling pathway // Leukocyte transendothelial migration // Long-term depression // Long-term potentiation // MAPK signaling pathway // Melanogenesis // Natural killer cell mediated cytotoxicity // Non-small cell lung cancer // Pathogenic Escherichia coli infection - EHEC // Pathogenic Escherichia coli infection - EPEC // Phosphatidylinositol signaling system // Tight junction // VEGF signaling pathway // Wnt signaling pathway |            |    |        |           |           |                                                                        |   |         |       |                |           |           |       |      |      |      |      |
| 213093_at                                                                                                                                                                                                                                                                                                                                                                                                                                                                                                                                                                                                         | PRKCA      | 17 | q24.2  | 62235503  | 62237322  |                                                                        | a | 1,6E-03 | 0,70  | FE0ADELA8ZF03  | 62228259  | 62408926  | IN.se | 0,28 | 0,06 | 0,43 | 0,14 |
| 205157_s_at                                                                                                                                                                                                                                                                                                                                                                                                                                                                                                                                                                                                       | KRT17      | 17 | q21.2  | 37029220  | 37034335  | Cell Communication                                                     | a | 1,4E-03 | 1,87  | FE0DBACA16ZF01 | 35737426  | 35916210  | OUT.s | 0,13 | 0,22 | 0,29 | 0,21 |
| 212236_x_at                                                                                                                                                                                                                                                                                                                                                                                                                                                                                                                                                                                                       | KRT17      | 17 | q21.2  | 37029219  | 37034332  | Cell Communication                                                     | a | 1,5E-03 | 1,72  | FE0DBACA16ZF01 | 35737426  | 35916210  | OUT.s | 0,13 | 0,22 | 0,29 | 0,21 |
| 1560563_at                                                                                                                                                                                                                                                                                                                                                                                                                                                                                                                                                                                                        | NA         | 17 | q25.3  | 78265073  | 78267418  | NA                                                                     | b | 2,3E-03 | -0,16 | FE0ADELA8ZH08  | 78134453  | 78311260  | IN.se | 0,19 | 0,13 | 0,21 | 0,21 |
| 213924_at                                                                                                                                                                                                                                                                                                                                                                                                                                                                                                                                                                                                         | MPPF1      | 18 | p11.21 | 11874195  | 11875819  |                                                                        | a | 1,8E-04 | 0,72  | FE0ADDELA8B04  | 11648522  | 11648086  | OUT.s | 0,09 | 0,13 | 0,36 | 0,14 |
| 206355_at                                                                                                                                                                                                                                                                                                                                                                                                                                                                                                                                                                                                         | GNAL       | 18 | p11.21 | 11742185  | 11872233  | Calcium signaling pathway // Olfactory transduction                    | a | 2,3E-04 | 0,54  | FE0ADELA8ZB04  | 11468522  | 11648086  | OUT.s | 0,09 | 0,13 | 0,36 | 0,14 |
| 206490_at                                                                                                                                                                                                                                                                                                                                                                                                                                                                                                                                                                                                         | DLGAP1     | 18 | p11.31 | 3492143   | 3835296   |                                                                        | a | 1,4E-03 | 0,30  | FE0DBACA13ZG06 | 3607103   | 3765893   | IN.se | 0,09 | 0,16 | 0,14 | 0,71 |
| 204855_at                                                                                                                                                                                                                                                                                                                                                                                                                                                                                                                                                                                                         | SERPINB5   | 18 | q21.33 | 59295198  | 59323297  |                                                                        | a | 1,6E-03 | 1,68  | FE0ADELA9ZE04  | 59104900  | 59292908  | OUT.s | 0,09 | 0,25 | 0,14 | 0,43 |
| 235075_at                                                                                                                                                                                                                                                                                                                                                                                                                                                                                                                                                                                                         | DSG3       | 18 | q12.1  | 27310854  | 27312666  | Cell Communication                                                     | a | 1,2E-03 | 1,02  | FE0DBACA7ZF05  | 27064581  | 27208580  | OUT.s | 0,09 | 0,16 | 0,07 | 0,64 |
| 205595_at                                                                                                                                                                                                                                                                                                                                                                                                                                                                                                                                                                                                         | DSG3       | 18 | q12.1  | 27281755  | 27310474  | Cell Communication                                                     | a | 1,2E-03 | 1,01  | FE0DBACA7ZF05  | 27064581  | 27208580  | OUT.s | 0,09 | 0,16 | 0,07 | 0,64 |
| Inositol phosphate metabolism // Phosphatidylinositol signaling system // Regulation of autophagy                                                                                                                                                                                                                                                                                                                                                                                                                                                                                                                 |            |    |        |           |           |                                                                        |   |         |       |                |           |           |       |      |      |      |      |
| 204297_at                                                                                                                                                                                                                                                                                                                                                                                                                                                                                                                                                                                                         | PIK3C3     | 18 | q12.3  | 37789207  | 37915358  |                                                                        | a | 9,2E-04 | 0,37  | FE0DBACA6ZA11  | 37831231  | 37996975  | IN.s  | 0,06 | 0,22 | 0,07 | 0,64 |
| 228681_x_at                                                                                                                                                                                                                                                                                                                                                                                                                                                                                                                                                                                                       | DAPK3      | 19 | p13.3  | 3909975   | 3910467   |                                                                        | b | 7,0E-04 | -0,19 | FE0BPADA9ZA03  | 3747566   | 3897695   | OUT.s | 0,06 | 0,06 | 0,14 | 0,14 |
| 224111_x_at                                                                                                                                                                                                                                                                                                                                                                                                                                                                                                                                                                                                       | KLF16      | 19 | p13.3  | 1803398   | 1814496   |                                                                        | b | 2,7E-03 | -0,18 | FE0BPADA7ZB10  | 1756515   | 1947280   | IN.se | 0,03 | 0,06 | 0,14 | 0,14 |
| 221417_x_at                                                                                                                                                                                                                                                                                                                                                                                                                                                                                                                                                                                                       | SIPR5      | 19 | p13.2  | 10485490  | 10486687  | Neuroactive ligand-receptor interaction                                | a | 2,9E-03 | -0,15 | FE0ADELA8ZA05  | 9986246   | 10114243  | OUT.s | 0,13 | 0,06 | 0,29 | 0,21 |
| 222242_s_at                                                                                                                                                                                                                                                                                                                                                                                                                                                                                                                                                                                                       | KLK5       | 19 | q13.33 | 56138698  | 56147701  |                                                                        | a | 8,4E-04 | 1,35  | FE0BPADA12ZA11 | 55987853  | 56202469  | IN.se | 0,09 | 0,03 | 0,43 | 0,00 |
| 232679_at                                                                                                                                                                                                                                                                                                                                                                                                                                                                                                                                                                                                         | PAPPA      | 19 | q13.11 | 39995071  | 39996323  |                                                                        | a | 1,8E-03 | 0,40  | FE0DBACA6ZH12  | 38838477  | 39020980  | OUT.s | 0,03 | 0,09 | 0,14 | 0,29 |
| 223496_s_at                                                                                                                                                                                                                                                                                                                                                                                                                                                                                                                                                                                                       | CCDC8      | 19 | q13.32 | 51605930  | 51608681  |                                                                        | a | 2,1E-03 | 0,58  | FE0DBACA26ZD08 | 50052290  | 50202708  | OUT.s | 0,06 | 0,03 | 0,29 | 0,21 |
| 229924_s_at                                                                                                                                                                                                                                                                                                                                                                                                                                                                                                                                                                                                       | JAG1       | 20 | p12.2  | 10587301  | 10602274  | Notch signaling pathway                                                | b | 1,7E-03 | -0,22 | FE0DBACA28ZE02 | 10477896  | 10618405  | IN.se | 0,22 | 0,06 | 0,71 | 0,07 |
| 1569906_s_at                                                                                                                                                                                                                                                                                                                                                                                                                                                                                                                                                                                                      | PHF20      | 20 | q11.22 | 33823383  | 33983298  |                                                                        | b | 5,5E-04 | -0,40 | FE0BPADA5ZH06  | 33234286  | 33386029  | OUT.s | 0,25 | 0,00 | 0,64 | 0,14 |
| 229578_at                                                                                                                                                                                                                                                                                                                                                                                                                                                                                                                                                                                                         | JPH2       | 20 | q13.12 | 42019620  | 42174337  |                                                                        | a | 1,9E-03 | 0,55  | FE0DBACA23ZC08 | 41725281  | 41887619  | OUT.s | 0,31 | 0,00 | 0,64 | 0,00 |
| 1561132_at                                                                                                                                                                                                                                                                                                                                                                                                                                                                                                                                                                                                        | DHX35      | 20 | q11.23 | 37085926  | 37086544  |                                                                        | b | 2,5E-03 | -0,17 | FE0DBACA6ZE12  | 36528191  | 36711090  | OUT.s | 0,25 | 0,00 | 0,71 | 0,00 |
| 241398_at                                                                                                                                                                                                                                                                                                                                                                                                                                                                                                                                                                                                         | MPPF1      | 22 | q13.2  | 42234490  | 42235052  |                                                                        | b | 2,9E-03 | -0,22 | FE0BPADA9ZF06  | 40929623  | 41097973  | OUT.s | 0,03 | 0,22 | 0,07 | 0,43 |
| 244758_at                                                                                                                                                                                                                                                                                                                                                                                                                                                                                                                                                                                                         | ZNF452     | NA | NA     | NA        | NA        | NA                                                                     | a | 2,6E-03 | 0,64  | NA             | NA        | NA        | NA    | NA   | NA   | NA   | NA   |
| 231147_at                                                                                                                                                                                                                                                                                                                                                                                                                                                                                                                                                                                                         | NA         | NA | NA     | NA        | NA        | NA                                                                     | b | 7,4E-04 | -0,18 | NA             | NA        | NA        | NA    | NA   | NA   | NA   | NA   |
| 1561910_at                                                                                                                                                                                                                                                                                                                                                                                                                                                                                                                                                                                                        | NA         | NA | NA     | NA        | NA        | NA                                                                     | b | 7,5E-04 | -0,22 | NA             | NA        | NA        | NA    | NA   | NA   | NA   | NA   |
| 230685_at                                                                                                                                                                                                                                                                                                                                                                                                                                                                                                                                                                                                         | NA         | NA | NA     | NA        | NA        | NA                                                                     | b | 2,1E-03 | -0,27 | NA             | NA        | NA        | NA    | NA   | NA   | NA   | NA   |
| 205541_s_at                                                                                                                                                                                                                                                                                                                                                                                                                                                                                                                                                                                                       | GSPT2      | X  | p11.22 | 51503283  | 51505763  |                                                                        | a | 2,6E-04 | 1,42  | FE0APADA1ZD04  | 51060132  | 51210370  | OUT.s | 0,03 | 0,13 | 0,14 | 0,36 |
| 219855_at                                                                                                                                                                                                                                                                                                                                                                                                                                                                                                                                                                                                         | NUDT11     | X  | p11.22 | 51249603  | 51256100  |                                                                        | a | 3,3E-04 | 0,37  | FE0APADA1ZD04  | 51060132  | 51210370  | OUT.s | 0,03 | 0,13 | 0,14 | 0,36 |
| 221933_at                                                                                                                                                                                                                                                                                                                                                                                                                                                                                                                                                                                                         | NLGN4X     | X  | p22.32 | 5818068   | 6155888   |                                                                        | a | 1,2E-03 | 1,17  | FE0APADA2ZA04  | 5831199   | 5996100   | IN.se | 0,06 | 0,13 | 0,21 | 0,50 |
| Axon guidance // ErbB signaling pathway // Focal adhesion // Regulation of actin cytoskeleton // Renal cell carcinoma // T cell receptor signaling pathway                                                                                                                                                                                                                                                                                                                                                                                                                                                        |            |    |        |           |           |                                                                        |   |         |       |                |           |           |       |      |      |      |      |
| 236277_at                                                                                                                                                                                                                                                                                                                                                                                                                                                                                                                                                                                                         | PAK3       | X  | q22.3  | 110258548 | 110259083 |                                                                        | a | 1,1E-03 | 0,37  | FE0BPADA5ZG02  | 108719433 | 108898995 | OUT.s | 0,06 | 0,09 | 0,14 | 0,21 |
| 227688_at                                                                                                                                                                                                                                                                                                                                                                                                                                                                                                                                                                                                         | LRCH2      | X  | q23    | 114251434 | 114320321 |                                                                        | a | 1,0E-03 | 0,35  | FE0DBACA15ZE10 | 114016334 | 114190846 | OUT.s | 0,06 | 0,09 | 0,14 | 0,36 |
| 203903_s_at                                                                                                                                                                                                                                                                                                                                                                                                                                                                                                                                                                                                       | HEPH       | X  | q12    | 65300833  | 65403952  |                                                                        | a | 1,7E-03 | 0,75  | FE0DBACA15ZG08 | 64678210  | 64856089  | OUT.s | 0,03 | 0,06 | 0,07 | 0,14 |
| 222235_s_at                                                                                                                                                                                                                                                                                                                                                                                                                                                                                                                                                                                                       | CSGALNACT2 | X  | q22.3  | 105457417 | 105459476 | Chondroitin sulfate biosynthesis // Glycan structures - biosynthesis 1 | a | 2,1E-03 | 0,36  | FE0BPADA12ZB02 | 104941165 | 105076568 | OUT.s | 0,06 | 0,09 | 0,07 | 0,29 |

a) BAC clone status: OUT.s proximal to the 5' end of the probe set; IN.s overlap of the 5' end of the probe set; IN.e overlap of the 3' end of the probe set; IN.se; spanning the probe set; NA not applicable

Supplementary table 6: gene ontology enrichment for the G2I-3 expression signature

| <i>name</i>                                            | <i>gene Symbol</i>  | <i>gene Cluster</i> |
|--------------------------------------------------------|---------------------|---------------------|
| Effects of calcineurin in Keratinocyte Differentiation | MARCKS;PPP3CC       | a                   |
| ECM-receptor interaction                               | LAMA1;ITGB8;CD44    | a                   |
| Natural killer cell mediated cytotoxicity              | PPP3CC;KLRC3;PIK3CD | a                   |
| Hedgehog signaling pathway                             | PRKX;GAS1           | a                   |
| Acute myeloid leukemia                                 | PML;PIK3CD          | a                   |
| B cell receptor signaling pathway                      | PIK3CD;PPP3CC       | a                   |
| VEGF signaling pathway                                 | PPP3CC;PIK3CD       | a                   |
| Long-term potentiation                                 | PPP3CC;PRKX         | a                   |
| Focal adhesion                                         | ITGB8;PIK3CD;LAMA1  | a                   |
| Regulation of actin cytoskeleton                       | TIAM2;PIK3CD;ITGB8  | a                   |
| Apoptosis                                              | PPP3CC;PIK3CD       | a                   |
| Small cell lung cancer                                 | PIK3CD;LAMA1        | a                   |
| T cell receptor signaling pathway                      | PIK3CD;PPP3CC       | a                   |
| GnRH signaling pathway                                 | MAP3K4;PRKX         | a                   |
| MAPK signaling pathway                                 | PRKX;MAP3K4;PPP3CC  | a                   |
| N-Glycan biosynthesis                                  | ALG3;RPN2           | b                   |
| Cholera - Infection                                    | GNAS;ATP6V0A2       | b                   |
| Long-term depression                                   | PLA2G12B;GNAS       | b                   |
| GnRH signaling pathway                                 | PLA2G12B;GNAS       | b                   |
| Glycan structures - biosynthesis 1                     | RPN2;ALG3           | b                   |
